# Supplementary material for: Assembly and evolutionary analysis of the complete mitochondrial genome of Trichosanthes kirilowii, a traditional Chinese medicinal plant
Source: PeerJ. 2024 Jul 18;12:e17747. doi: 10.7717/peerj.17747 (PMC11260417; doi:10.7717/peerj.17747)
Supplement: Supplemental Information 2 [file peerj-12-17747-s002.xlsx]

## Sheet: Dispersed_repeats
Table S2 Dispersed repeat sequences in the mitochondrial genome of T. kirilowii
The repeat length of the first part	The starting site of the first part	Matching direction	The repeat length of the second part	The starting site of the second part	Interval distance of repeats	E-value
282	154449	P	282	240774	-2	1e-154
268	154463	P	268	240774	0	7.55e-152
235	154736	P	235	240536	0	5.57e-132
122	135867	P	122	179850	0	6.01e-64
85	58061	P	85	114878	-1	2.89e-39
82	23548	P	82	32646	-2	2.17e-35
69	40654	P	69	154662	0	4.87e-32
61	9885	P	61	48628	-1	5.84e-25
62	37698	P	62	245360	-3	8.15e-22
58	75012	P	58	75012	-2	3.04e-21
61	48628	P	61	245361	-3	3.1e-21
49	9897	P	49	48628	0	5.36e-20
52	37708	P	52	245360	-2	9.99e-18
51	40614	P	51	154726	-2	3.84e-17
44	125901	P	44	142552	0	5.49e-17
47	106763	P	47	245360	-2	8.34e-15
40	202485	P	40	202485	0	1.4e-14
42	37718	P	42	245360	-1	1.11e-13
38	197884	P	38	221380	0	2.25e-13
41	54223	P	41	167599	-1	4.32e-13
36	23315	P	36	89142	0	3.6e-12
36	132131	P	36	177274	0	3.6e-12
42	8207	P	42	83631	-2	6.8e-12
42	136999	P	42	245360	-2	6.8e-12
38	60434	P	38	221570	-1	2.56e-11
34	81501	P	34	81501	0	5.75e-11
33	21827	P	33	140081	0	2.3e-10
33	40667	P	33	132023	0	2.3e-10
33	106777	P	33	245360	0	2.3e-10
33	132023	P	33	240787	0	2.3e-10
42	46076	P	42	221376	-3	2.72e-10
32	8096	P	32	243432	0	9.2e-10
32	69668	P	32	180112	0	9.2e-10
32	84896	P	32	137000	0	9.2e-10
32	86194	P	32	180112	0	9.2e-10
32	165867	P	32	222664	0	9.2e-10
32	174513	P	32	225205	0	9.2e-10
41	9885	P	41	37718	-3	1.01e-09
41	9885	P	41	106768	-3	1.01e-09
41	87066	P	41	245403	-3	1.01e-09
41	87073	P	41	245361	-3	1.01e-09
38	103723	P	38	132129	-2	1.42e-09
35	23595	P	35	32646	-1	1.51e-09
35	46129	P	35	245317	-1	1.51e-09
35	197937	P	35	245317	-1	1.51e-09
31	4723	P	31	125678	0	3.68e-09
31	9950	P	31	48628	0	3.68e-09
31	11732	P	31	155110	0	3.68e-09
31	58115	P	31	114878	0	3.68e-09
34	103563	P	34	217372	-1	5.87e-09
39	9897	P	39	37708	-3	1.39e-08
39	21454	P	39	37720	-3	1.39e-08
30	142238	P	30	216054	0	1.47e-08
30	194711	P	30	210585	0	1.47e-08
36	46103	P	36	70833	-2	2.04e-08
36	70833	P	36	197911	-2	2.04e-08
33	18869	P	33	70928	-1	2.28e-08
33	137008	P	33	245360	-1	2.28e-08
33	156191	P	33	157416	-1	2.28e-08
38	9933	P	38	37708	-3	5.12e-08
32	37719	P	32	84896	-1	8.84e-08
32	50205	P	32	54612	-1	8.84e-08
32	84896	P	32	106769	-1	8.84e-08
37	9911	P	37	87086	-3	1.89e-07
37	70764	P	37	85704	-3	1.89e-07
34	111240	P	34	139834	-2	2.9e-07
31	11732	P	31	52733	-1	3.42e-07
31	26745	P	31	139843	-1	3.42e-07
31	85515	P	31	243132	-1	3.42e-07
33	9913	P	33	37698	-2	1.09e-06
33	38280	P	33	174129	-2	1.09e-06
33	121498	P	33	223481	-2	1.09e-06
30	8009	P	30	143902	-1	1.33e-06
30	15257	P	30	32700	-1	1.33e-06
30	40635	P	30	154726	-1	1.33e-06
30	56289	P	30	194889	-1	1.33e-06
30	118703	P	30	216320	-1	1.33e-06
30	132164	P	30	180114	-1	1.33e-06
35	22951	P	35	139995	-3	2.54e-06
35	40798	P	35	154086	-3	2.54e-06
32	9951	P	32	87086	-2	4.11e-06
32	11442	P	32	38414	-2	4.11e-06
32	87086	P	32	245392	-2	4.11e-06
34	9892	P	34	48613	-3	9.29e-06
34	9927	P	34	87073	-3	9.29e-06
34	21431	P	34	37713	-3	9.29e-06
34	21446	P	34	48628	-3	9.29e-06
34	37718	P	34	245403	-3	9.29e-06
31	9950	P	31	37698	-2	1.54e-05
31	21451	P	31	106781	-2	1.54e-05
31	26744	P	31	153694	-2	1.54e-05
31	53644	P	31	242786	-2	1.54e-05
31	103798	P	31	152716	-2	1.54e-05
31	122373	P	31	174810	-2	1.54e-05
31	174513	P	31	211647	-2	1.54e-05
33	21447	P	33	37698	-3	3.39e-05
33	60450	P	33	221559	-3	3.39e-05
30	31575	P	30	152526	-2	5.77e-05
30	43787	P	30	224422	-2	5.77e-05
30	54616	P	30	86595	-2	5.77e-05
30	126750	P	30	126750	-2	5.77e-05
32	8096	P	32	167573	-3	0.000123
32	9885	P	32	137008	-3	0.000123
32	21419	P	32	106777	-3	0.000123
32	21450	P	32	87086	-3	0.000123
32	21454	P	32	137008	-3	0.000123
32	48649	P	32	84896	-3	0.000123
32	84896	P	32	87074	-3	0.000123
32	85420	P	32	126736	-3	0.000123
32	104472	P	32	129656	-3	0.000123
31	9962	P	31	37721	-3	0.000447
31	9962	P	31	87076	-3	0.000447
31	15623	P	31	137002	-3	0.000447
31	21449	P	31	48663	-3	0.000447
31	40815	P	31	154073	-3	0.000447
31	40912	P	31	206695	-3	0.000447
31	111183	P	31	161390	-3	0.000447
31	111231	P	31	153696	-3	0.000447
30	8200	P	30	197891	-3	0.00161
30	9885	P	30	37694	-3	0.00161
30	9898	P	30	37681	-3	0.00161
30	30690	P	30	103867	-3	0.00161
30	45525	P	30	134913	-3	0.00161
30	45766	P	30	135097	-3	0.00161
30	73161	P	30	103222	-3	0.00161
30	116562	P	30	216269	-3	0.00161
30	141424	P	30	142452	-3	0.00161
30	200579	P	30	244672	-3	0.00161
130	88701	F	130	222349	0	9.16e-69
138	50095	F	138	86487	-2	1.19e-68
136	46074	F	136	197882	-2	1.85e-67
126	46084	F	126	197892	0	2.35e-66
121	50112	F	121	86504	0	2.4e-63
121	48977	F	121	177782	-1	8.72e-61
121	15166	F	121	23455	-2	1.57e-58
101	137870	F	101	222308	0	2.64e-51
105	102282	F	105	245501	-2	5.07e-49
93	32562	F	93	202886	0	1.73e-46
91	52763	F	91	245609	0	2.77e-45
89	49009	F	89	177814	0	4.43e-44
85	15202	F	85	23491	0	1.13e-41
87	52679	F	87	155056	-1	1.85e-40
80	5	F	80	102381	-1	2.79e-36
73	40650	F	73	240770	0	1.9e-34
76	9885	F	76	245361	-2	7.63e-32
64	21	F	64	102397	0	4.99e-29
65	135826	F	65	155050	-1	2.43e-27
64	52674	F	64	135827	-1	9.58e-27
60	88701	F	60	137911	0	1.28e-26
60	125093	F	60	128138	0	1.28e-26
63	50231	F	63	86620	-1	3.77e-26
58	202055	F	58	242308	-1	3.56e-23
60	9933	F	60	245374	-2	2.03e-22
60	69218	F	60	244110	-2	2.03e-22
57	37674	F	57	48604	-2	1.17e-20
50	104393	F	50	245449	0	1.34e-20
49	52258	F	49	113486	0	5.36e-20
48	9913	F	48	245389	0	2.14e-19
50	69228	F	50	244120	-1	2.01e-18
44	102239	F	44	245459	0	5.49e-17
43	9915	F	43	9950	0	2.19e-16
43	9950	F	43	245391	0	2.19e-16
43	50251	F	43	86640	0	2.19e-16
46	37716	F	46	136997	-1	4.73e-16
45	102239	F	45	104403	-1	1.85e-15
51	37708	F	51	48638	-3	1.88e-15
51	138412	F	51	154179	-3	1.88e-15
44	106766	F	44	136997	-1	7.24e-15
47	37713	F	47	106763	-2	8.34e-15
39	69662	F	39	86188	0	5.62e-14
48	138436	F	48	154203	-3	1e-13
48	138453	F	48	154220	-3	1e-13
47	9912	F	47	21446	-3	3.75e-13
46	21447	F	46	245389	-3	1.41e-12
40	80676	F	40	80715	-1	1.69e-12
40	155195	F	40	156048	-1	1.69e-12
36	123831	F	36	176123	0	3.6e-12
45	37683	F	45	87073	-3	5.25e-12
35	37727	F	35	137008	0	1.44e-11
35	48518	F	35	208179	0	1.44e-11
41	37718	F	41	48648	-2	2.59e-11
41	37718	F	41	87073	-2	2.59e-11
41	40614	F	41	240730	-2	2.59e-11
34	7141	F	34	208159	0	5.75e-11
43	9950	F	43	21449	-3	7.31e-11
43	37683	F	43	48648	-3	7.31e-11
43	48613	F	43	48648	-3	7.31e-11
40	15015	F	40	48513	-2	9.86e-11
33	20032	F	33	158436	0	2.3e-10
33	132023	F	33	154685	0	2.3e-10
39	58376	F	39	58394	-2	3.75e-10
32	27644	F	32	63511	0	9.2e-10
41	9885	F	41	21419	-3	1.01e-09
41	21419	F	41	245361	-3	1.01e-09
41	48648	F	41	136999	-3	1.01e-09
41	48755	F	41	53152	-3	1.01e-09
41	87073	F	41	136999	-3	1.01e-09
31	17142	F	31	179078	0	3.68e-09
31	81606	F	31	103515	0	3.68e-09
31	202117	F	31	242372	0	3.68e-09
37	29868	F	37	82074	-2	5.39e-09
37	103722	F	37	177273	-2	5.39e-09
37	138464	F	37	154231	-2	5.39e-09
34	51309	F	34	208735	-1	5.87e-09
39	21454	F	39	245361	-3	1.39e-08
39	30123	F	39	240436	-3	1.39e-08
39	85704	F	39	129712	-3	1.39e-08
30	37698	F	30	87088	0	1.47e-08
30	92032	F	30	108060	0	1.47e-08
36	69662	F	36	132158	-2	2.04e-08
36	86188	F	36	132158	-2	2.04e-08
33	37727	F	33	106777	-1	2.28e-08
35	15020	F	35	208179	-2	7.7e-08
35	18758	F	35	85705	-2	7.7e-08
35	87521	F	35	199932	-2	7.7e-08
32	211649	F	32	225208	-1	8.84e-08
34	15193	F	34	48872	-2	2.9e-07
34	111476	F	34	161128	-2	2.9e-07
31	23488	F	31	48878	-1	3.42e-07
31	48329	F	31	52563	-1	3.42e-07
36	26740	F	36	111229	-3	6.93e-07
36	167572	F	36	243431	-3	6.93e-07
33	7704	F	33	131595	-2	1.09e-06
30	35762	F	30	160151	-1	1.33e-06
30	80263	F	30	130021	-1	1.33e-06
30	116362	F	30	239989	-1	1.33e-06
30	121881	F	30	155241	-1	1.33e-06
35	48628	F	35	87088	-3	2.54e-06
32	9927	F	32	21461	-2	4.11e-06
32	18758	F	32	129713	-2	4.11e-06
32	21461	F	32	245403	-2	4.11e-06
32	37694	F	32	48659	-2	4.11e-06
32	48624	F	32	48659	-2	4.11e-06
32	48657	F	32	137008	-2	4.11e-06
32	48764	F	32	53161	-2	4.11e-06
32	84896	F	32	245369	-2	4.11e-06
32	87082	F	32	137008	-2	4.11e-06
32	132216	F	32	197871	-2	4.11e-06
32	149963	F	32	210305	-2	4.11e-06
31	6448	F	31	241829	-2	1.54e-05
31	9962	F	31	21461	-2	1.54e-05
31	27700	F	31	63555	-2	1.54e-05
31	53023	F	31	102524	-2	1.54e-05
31	111436	F	31	161093	-2	1.54e-05
31	139806	F	31	153663	-2	1.54e-05
31	158624	F	31	210467	-2	1.54e-05
33	2991	F	33	67957	-3	3.39e-05
30	24081	F	30	42332	-2	5.77e-05
30	72103	F	30	76595	-2	5.77e-05
30	76977	F	30	212992	-2	5.77e-05
30	85519	F	30	86494	-2	5.77e-05
32	48657	F	32	106777	-3	0.000123
32	60778	F	32	60799	-3	0.000123
32	87082	F	32	106777	-3	0.000123
32	111342	F	32	160989	-3	0.000123
32	120012	F	32	149937	-3	0.000123
31	7278	F	31	243541	-3	0.000447
31	9880	F	31	21449	-3	0.000447
31	50168	F	31	144865	-3	0.000447
31	86560	F	31	144865	-3	0.000447
31	139846	F	31	153696	-3	0.000447
31	145445	F	31	241236	-3	0.000447
30	8200	F	30	221381	-3	0.00161
30	15624	F	30	84896	-3	0.00161
30	30002	F	30	52869	-3	0.00161
30	37716	F	30	48611	-3	0.00161
30	40562	F	30	41751	-3	0.00161
30	50102	F	30	85519	-3	0.00161
30	78139	F	30	199667	-3	0.00161
30	227040	F	30	229264	-3	0.00161
