# Supplementary material for: Assembly and evolutionary analysis of the complete mitochondrial genome of Trichosanthes kirilowii, a traditional Chinese medicinal plant
Source: PeerJ. 2024 Jul 18;12:e17747. doi: 10.7717/peerj.17747 (PMC11260417; doi:10.7717/peerj.17747)
Supplement: Supplemental Information 3 [file peerj-12-17747-s003.xlsx]

## Sheet: SSRs
Table S3 SSRs in the mitochondrial genome of T. kirilowii
Mitochondrial genome	SSR nr.	SSR type	SSR	size	start	end
Chromosome 1	1	p4	(CATT)3	12	835	846
Chromosome 1	2	p1	(A)14	14	2274	2287
Chromosome 1	3	p4	(GTAT)3	12	3024	3035
Chromosome 1	4	p3	(GAC)4	12	7045	7056
Chromosome 1	5	p3	(CTT)4	12	9072	9083
Chromosome 1	6	p3	(TGA)4	12	10914	10925
Chromosome 1	7	p1	(T)14	14	21742	21755
Chromosome 1	8	p4	(CAAA)3	12	30237	30248
Chromosome 1	9	p4	(CTTA)3	12	32436	32447
Chromosome 1	10	p4	(AAAG)3	12	34779	34790
Chromosome 1	11	p4	(AGAA)3	12	36917	36928
Chromosome 1	12	p1	(A)10	10	38585	38594
Chromosome 1	13	p2	(TA)5	10	43549	43558
Chromosome 1	14	p4	(ATGG)3	12	47999	48010
Chromosome 1	15	p2	(AG)5	10	49149	49158
Chromosome 1	16	p3	(TAA)4	12	52883	52894
Chromosome 1	17	p4	(CTAG)3	12	53946	53957
Chromosome 1	18	p1	(T)12	12	54812	54823
Chromosome 1	19	p4	(AAAT)4	16	61663	61678
Chromosome 1	20	p3	(GAT)4	12	69940	69951
Chromosome 1	21	p1	(A)10	10	79030	79039
Chromosome 1	22	p2	(TA)5	10	80001	80010
Chromosome 1	23	p4	(CCTT)3	12	81427	81438
Chromosome 1	24	p2	(AT)9	18	81510	81527
Chromosome 1	25	p4	(GAGC)3	12	85765	85776
Chromosome 1	26	p3	(CAA)4	12	86358	86369
Chromosome 1	27	p1	(T)11	11	86889	86899
Chromosome 1	28	p1	(T)11	11	87302	87312
Chromosome 1	29	p1	(C)10	10	92192	92201
Chromosome 1	30	p3	(GCT)4	12	94251	94262
Chromosome 1	31	p2	(TC)5	10	94851	94860
Chromosome 1	32	p1	(T)10	10	95621	95630
Chromosome 1	33	p4	(AAGA)3	12	100817	100828
Chromosome 1	34	p4	(AAAG)3	12	100863	100874
Chromosome 1	35	p4	(TTAA)3	12	100942	100953
Chromosome 1	36	p4	(AAGA)3	12	101953	101964
Chromosome 1	37	p1	(A)13	13	102192	102204
Chromosome 1	38	p2	(TA)6	12	107831	107842
Chromosome 1	39	p1	(T)10	10	111209	111218
Chromosome 1	40	p1	(T)12	12	111227	111238
Chromosome 1	41	p2	(TA)5	10	114031	114040
Chromosome 1	42	p3	(AAG)4	12	122367	122378
Chromosome 1	43	p4	(ATGA)3	12	126242	126253
Chromosome 1	44	p1	(G)10	10	128060	128069
Chromosome 1	45	p1	(A)10	10	133246	133255
Chromosome 1	46	p2	(AT)5	10	133546	133555
Chromosome 1	47	p2	(CT)5	10	134820	134829
Chromosome 1	48	p4	(ATAA)3	12	137056	137067
Chromosome 1	49	p2	(TC)5	10	140756	140765
Chromosome 1	50	p1	(A)14	14	144372	144385
Chromosome 1	51	p4	(TTCA)3	12	144579	144590
Chromosome 1	52	p1	(T)10	10	145292	145301
Chromosome 1	53	p4	(GAAA)3	12	146264	146275
Chromosome 1	54	p5	(TTAGT)3	15	146830	146844
Chromosome 1	55	p1	(T)10	10	147318	147327
Chromosome 1	56	p1	(T)10	10	149884	149893
Chromosome 1	57	p1	(A)12	12	150568	150579
Chromosome 1	58	p1	(T)13	13	150654	150666
Chromosome 1	59	p2	(CT)6	12	150908	150919
Chromosome 1	60	p1	(T)10	10	153790	153799
Chromosome 1	61	p1	(A)11	11	155742	155752
Chromosome 1	62	p2	(AT)6	12	163094	163105
Chromosome 1	63	p4	(TGAA)3	12	163990	164001
Chromosome 1	64	p1	(A)11	11	165845	165855
Chromosome 1	65	p2	(CA)5	10	169157	169166
Chromosome 1	66	p1	(T)10	10	172402	172411
Chromosome 1	67	p1	(A)15	15	173175	173189
Chromosome 1	68	p2	(TC)5	10	174333	174342
Chromosome 1	69	p1	(T)10	10	174356	174365
Chromosome 1	70	p2	(AG)5	10	174530	174539
Chromosome 1	71	p4	(GACT)3	12	181898	181909
Chromosome 1	72	p4	(TCCA)3	12	187541	187552
Chromosome 1	73	p3	(GAA)4	12	189182	189193
Chromosome 1	74	p4	(TTCA)3	12	191524	191535
Chromosome 1	75	p4	(GTGA)3	12	191722	191733
Chromosome 1	76	p1	(A)10	10	193912	193921
Chromosome 1	77	p1	(T)10	10	194398	194407
Chromosome 1	78	p1	(A)10	10	200680	200689
Chromosome 1	79	p4	(TTGC)3	12	202727	202738
Chromosome 1	80	p2	(TC)7	14	205104	205117
Chromosome 1	81	p1	(C)11	11	206696	206706
Chromosome 1	82	p1	(A)10	10	208309	208318
Chromosome 1	83	p1	(T)10	10	208321	208330
Chromosome 1	84	p1	(A)11	11	209303	209313
Chromosome 1	85	p1	(T)10	10	209756	209765
Chromosome 1	86	p1	(T)10	10	210455	210464
Chromosome 1	87	p4	(AAAG)3	12	212674	212685
Chromosome 1	88	p1	(T)10	10	219934	219943
Chromosome 1	89	p1	(T)11	11	220524	220534
Chromosome 1	90	p2	(AT)6	12	222575	222586
Chromosome 1	91	p2	(CT)5	10	225212	225221
Chromosome 1	92	p2	(CT)5	10	234006	234015
Chromosome 1	93	p1	(T)10	10	243481	243490
