# Supplementary material for: Assembly and evolutionary analysis of the complete mitochondrial genome of Trichosanthes kirilowii, a traditional Chinese medicinal plant
Source: PeerJ. 2024 Jul 18;12:e17747. doi: 10.7717/peerj.17747 (PMC11260417; doi:10.7717/peerj.17747)
Supplement: Supplemental Information 4 [file peerj-12-17747-s004.xlsx]

## Sheet: Tandem_repeats
Table S4 Tandem repeat sequences in the mitochondrial genome of T. kirilowii
Indices	Period	Copy	Consensus	Percent	Percent	Score	A	C	G	T	Entropy
	Size	Number	Size	Matches	Indels						(0-2)
9886--9993	35	3.1	35	90	5	139	28	19	37	13	1.9
37682--37759	35	2.2	35	88	4	113	12	39	17	29	1.87
48612--48691	35	2.3	35	91	0	133	12	40	16	31	1.85
58377--58433	18	3.2	18	94	0	105	35	28	5	31	1.79
58377--58433	9	6.3	9	72	0	51	35	28	5	31	1.79
60765--60853	21	4.1	21	81	5	81	56	8	22	12	1.64
80677--80755	39	2	39	97	0	149	21	27	18	31	1.97
106895--106926	16	2	16	100	0	64	25	31	0	43	1.55
162189--162221	18	1.9	18	88	11	52	36	15	21	27	1.93
245362--245437	35	2.2	35	88	4	109	28	19	39	11	1.87
