# Supplementary material for: Assembly and evolutionary analysis of the complete mitochondrial genome of Trichosanthes kirilowii, a traditional Chinese medicinal plant
Source: PeerJ. 2024 Jul 18;12:e17747. doi: 10.7717/peerj.17747 (PMC11260417; doi:10.7717/peerj.17747)
Supplement: Supplemental Information 5 [file peerj-12-17747-s005.xlsx]

## Sheet: Dispersed_repeats
Table S5 Dispersed repeat sequences in the mitochondrial genome of T. kirilowii
The repeat length of the first part	The starting site of the first part	Matching direction	The repeat length of the second part	The starting site of the second part	Interval distance of repeats	E-value
64	13305	P	64	106710	0	9.47e-30
56	7977	P	56	97091	0	6.21e-25
42	21432	P	42	104724	-2	1.29e-12
32	34754	P	32	34754	0	1.75e-10
33	40913	P	33	63135	-1	4.32e-09
31	11995	P	31	21458	-1	6.5e-08
30	21444	P	30	104724	-1	2.52e-07
30	11465	P	30	102723	-2	1.09e-05
30	19557	P	30	20663	-2	1.09e-05
31	51667	P	31	87388	-3	8.48e-05
30	10932	P	30	78504	-3	0.000306
30	15991	P	30	85634	-3	0.000306
30	65104	P	30	95944	-3	0.000306
173	52659	F	173	73412	0	2.25e-95
60	52480	F	60	106276	-3	2.24e-21
47	52493	F	47	106289	-1	2.29e-17
39	52501	F	39	106297	0	1.07e-14
35	21748	F	35	46996	0	2.73e-12
32	25077	F	32	71940	0	1.75e-10
35	64315	F	35	98046	-1	2.87e-10
34	62805	F	34	62862	-1	1.11e-09
34	77667	F	34	97843	-1	1.11e-09
33	102299	F	33	107016	-2	2.08e-07
30	56774	F	30	107019	-1	2.52e-07
30	65331	F	30	90944	-1	2.52e-07
30	10019	F	30	77671	-2	1.09e-05
30	10021	F	30	97849	-2	1.09e-05
30	22224	F	30	62146	-2	1.09e-05
32	31565	F	32	31640	-3	2.34e-05
31	31552	F	31	31627	-3	8.48e-05
31	56747	F	31	102289	-3	8.48e-05
30	34439	F	30	34466	-3	0.000306
30	36031	F	30	36071	-3	0.000306
30	56775	F	30	102303	-3	0.000306
