# Supplementary material for: Assembly and evolutionary analysis of the complete mitochondrial genome of Trichosanthes kirilowii, a traditional Chinese medicinal plant
Source: PeerJ. 2024 Jul 18;12:e17747. doi: 10.7717/peerj.17747 (PMC11260417; doi:10.7717/peerj.17747)
Supplement: Supplemental Information 6 [file peerj-12-17747-s006.xlsx]

## Sheet: SSRs
Table S6 SSRs in the mitochondrial genome of T. kirilowii
Mitochondrial genome	SSR nr.	SSR type	SSR	size	start	end
Chromosome 2	1	p5	(CTAGT)3	15	422	436
Chromosome 2	2	p1	(A)10	10	3078	3087
Chromosome 2	3	p2	(AC)5	10	3679	3688
Chromosome 2	4	p2	(AT)6	12	4172	4183
Chromosome 2	5	p1	(A)12	12	4821	4832
Chromosome 2	6	p1	(T)10	10	4907	4916
Chromosome 2	7	p2	(CT)5	10	5544	5553
Chromosome 2	8	p3	(GAA)4	12	8170	8181
Chromosome 2	9	p3	(GAA)4	12	8944	8955
Chromosome 2	10	p3	(GGA)4	12	12986	12997
Chromosome 2	11	p2	(AG)5	10	14426	14435
Chromosome 2	12	p1	(A)10	10	14524	14533
Chromosome 2	13	p4	(AGAA)3	12	16382	16393
Chromosome 2	14	p2	(TA)5	10	19052	19061
Chromosome 2	15	p4	(AAGA)3	12	32013	32024
Chromosome 2	16	p1	(T)14	14	35574	35587
Chromosome 2	17	p3	(TTC)4	12	39077	39088
Chromosome 2	18	p1	(A)10	10	40408	40417
Chromosome 2	19	p4	(CGGC)3	12	49399	49410
Chromosome 2	20	p1	(T)10	10	53871	53880
Chromosome 2	21	p1	(A)12	12	62432	62443
Chromosome 2	22	p1	(T)11	11	62448	62458
Chromosome 2	23	p4	(GCTG)3	12	65167	65178
Chromosome 2	24	p4	(AAAG)3	12	66898	66909
Chromosome 2	25	p2	(TA)5	10	71134	71143
Chromosome 2	26	p1	(T)11	11	75400	75410
Chromosome 2	27	p4	(ACCA)3	12	76335	76346
Chromosome 2	28	p4	(GACC)3	12	86205	86216
Chromosome 2	29	p1	(T)10	10	87600	87609
Chromosome 2	30	p5	(TTAGT)3	15	88141	88155
Chromosome 2	31	p5	(CCCTT)3	15	97844	97858
Chromosome 2	32	p4	(TCTT)4	16	100301	100316
Chromosome 2	33	p4	(ATTG)3	12	103362	103373
Chromosome 2	34	p1	(T)10	10	104311	104320
