# Supplementary material for: Assembly and evolutionary analysis of the complete mitochondrial genome of Trichosanthes kirilowii, a traditional Chinese medicinal plant
Source: PeerJ. 2024 Jul 18;12:e17747. doi: 10.7717/peerj.17747 (PMC11260417; doi:10.7717/peerj.17747)
Supplement: Supplemental Information 7 [file peerj-12-17747-s007.xlsx]

## Sheet: Tandem_repeats
Table S7 Tandem repeat sequences in the mitochondrial genome of T. kirilowii
Indices	Period	Copy	Consensus	Percent	Percent	Score	A	C	G	T	Entropy
	Size	Number	Size	Matches	Indels						(0-2)
34443--34496	27	2	27	92	0	90	31	18	18	31	1.95
56762--56789	14	2	14	100	0	56	50	14	7	28	1.69
61537--61574	18	2.1	19	90	5	60	55	13	13	18	1.69
104689--104766	35	2.2	35	86	8	106	12	39	16	30	1.86
