# Supplementary material for: Assembly and evolutionary analysis of the complete mitochondrial genome of Trichosanthes kirilowii, a traditional Chinese medicinal plant
Source: PeerJ. 2024 Jul 18;12:e17747. doi: 10.7717/peerj.17747 (PMC11260417; doi:10.7717/peerj.17747)
Supplement: Supplemental Information 8 [file peerj-12-17747-s008.xlsx]

## Sheet: Sheet1
Table S8 RNA editing sites in mitochondrial PCGs of T. kirilowi
gene	Base position	Amino position	Codon change	Amino change	Left motifs	Edited site	Right motifs	Probability
atp1	1039	347	CCU->UCU	Pro->Ser	ATATTCCCACCAATGTGATC	C	CTATTACTGATGGACAAATC	0.999
atp1	1178	393	UCA->UUA	Ser->Leu	GAAACAAGTCTGCGGTAGTT	C	AAAACTGGAATTGGCACAAT	1
atp1	1292	431	CCG->CUG	Pro->Leu	TGCAAGGCTTACAGAAGTAC	C	GAAACAACCACAATATGCAC	0.999
atp1	1415	472	CCA->CUA	Pro->Leu	TCAATATGAGAGAGCCATTC	C	AAGTCGTATAAAACCAGAAT	0.994
atp1	1490	497	CCA->CUA	Pro->Leu	TAACGAAAGAAAGATGGAAC	C	AGATGCATTCTTAAAAGAAA	1
atp4	59	20	UCU->UUU	Ser->Phe	GCTATTTGCTGCTATTCTAT	C	TATTTGTGCATTAAGTTCGA	0.995
atp4	89	30	UCA->UUA	Ser->Leu	ATTAAGTTCGAAGAAGATCT	C	AATCTATAATGAAGAAATGA	1
atp4	118	40	CGU->UGU	Arg->Cys	ATGAAGAAATGATAGTAGCT	C	GTTGTTTTATAGGCTTTATT	0.968
atp4	215	72	UCG->UUG	Ser->Leu	CCAGGCTATTCAGGAAGAAT	C	GCAGCAATTTCCCAATCCTA	0.999
atp4	227	76	CCC->CUC	Pro->Leu	GGAAGAATCGCAGCAATTTC	C	CAATCCTAACGAAGTAGTTC	0.999
atp4	248	83	CCU->CUU	Pro->Leu	CAATCCTAACGAAGTAGTTC	C	TCCGGAATCCAATGAACAAC	1
atp4	250	84	CCG->UUG	Pro->Leu	ATCCTAACGAAGTAGTTCCT	C	CGGAATCCAATGAACAACAA	0.903
atp4	251	84	CCG->UUG	Pro->Leu	TCCTAACGAAGTAGTTCCTC	C	GGAATCCAATGAACAACAAC	1
atp4	306	102	ACC->ACU	Thr->Thr	AGTTTGCGAATTTGTGGCAC	C	GTAGTCGAATCATTACCAAT	0.908
atp4	395	132	UCA->UUA	Ser->Leu	CCGAAACCTAAATGTTAAGT	C	AGCAACACTTCCAAATGCCA	0.999
atp4	407	136	CCA->CUA	Pro->Leu	TGTTAAGTCAGCAACACTTC	C	AAATGCCACTTCTTCCCGTC	0.993
atp4	416	139	ACU->AUU	Thr->Ile	AGCAACACTTCCAAATGCCA	C	TTCTTCCCGTCGCATCCGTC	0.987
atp6	37	13	CCA->UCA	Pro->Ser	TTTATTTCTCATTCACAAAT	C	CATCTTTGTTTATGCTGCTA	1
atp6	116	39	UCA->UUA	Ser->Leu	TAAAAACGGAGGAGGAAACT	C	AGTACCAAATGCTTGGCAAT	0.999
atp6	167	56	CCG->CUG	Pro->Leu	GCTTATTTATGATTTCGTGC	C	GAACCTGGTAAACGAACAAA	1
atp6	229	77	CGC->UGC	Arg->Cys	TTAAACAAAAGTTTTTCCCT	C	GCATCTCGGTCACTTTTACT	0.999
atp6	236	79	UCG->UUG	Ser->Leu	AAAGTTTTTCCCTCGCATCT	C	GGTCACTTTTACTTTTTCGT	0.99
atp6	254	85	UCG->UUG	Ser->Leu	CTCGGTCACTTTTACTTTTT	C	GTTATTTCGTAATCCCCAGG	0.998
atp6	262	88	CGU->UGU	Arg->Cys	CTTTTACTTTTTCGTTATTT	C	GTAATCCCCAGGGTATGATA	0.999
atp6	269	90	CCC->CUU	Pro->Leu	TTTTTCGTTATTTCGTAATC	C	CCAGGGTATGATACCTTATA	0.997
atp6	270	90	CCC->CUU	Pro->Leu	TTTTCGTTATTTCGTAATCC	C	CAGGGTATGATACCTTATAG	0.968
atp6	401	134	UCA->UUA	Ser->Leu	GCTTCATTTTTTAAGTTTCT	C	ATTACCCGCAGGAGTCCCAC	0.998
atp6	460	154	CCU->UCU	Pro->Ser	TAGTACTCCTTGAGCTAATC	C	CTCATTGTTTTCGCGCATTA	0.999
atp6	463	155	CAU->UAU	His->Tyr	TACTCCTTGAGCTAATCCCT	C	ATTGTTTTCGCGCATTAAGC	1
atp6	485	162	UCA->UUA	Ser->Leu	TTGTTTTCGCGCATTAAGCT	C	AGGAATACGTTTATTTGCTA	0.999
atp6	527	176	UCA->UUA	Ser->Leu	TATGATGGCCGGTCATAGTT	C	AGTAAAGATTTTAAGTGGGT	1
atp6	548	183	UCC->UUC	Ser->Phe	AGTAAAGATTTTAAGTGGGT	C	CGCTTGGACTATGCTATGTA	1
atp6	599	200	CCU->CUU	Pro->Leu	TTTCTATTTCATAGGAGATC	C	TGGTCCTTTATTTATAGTTC	0.999
atp6	656	219	UCA->UUA	Ser->Leu	GGAATTAGGTGTAGCTATAT	C	ACAAGCTCATGTTTCTACGA	0.998
atp6	664	222	CAU->UAU	His->Tyr	GTGTAGCTATATCACAAGCT	C	ATGTTTCTACGATCTCAATC	0.99
atp6	671	224	UCU->UUU	Ser->Phe	TATATCACAAGCTCATGTTT	C	TACGATCTCAATCTGTATTT	0.997
atp6	680	227	UCA->UUA	Ser->Leu	AGCTCATGTTTCTACGATCT	C	AATCTGTATTTACTTGAATG	1
atp6	707	236	ACA->AUA	Thr->Ile	TATTTACTTGAATGATGCTA	C	AAATCTCCATCAAAATGGTT	0.999
atp6	718	240	CAA->UAA	Gln->End	ATGATGCTACAAATCTCCAT	C	AAAATGGTTATTTATTTATA	0.996
atp8	47	16	UCA->UUA	Ser->Leu	TTTCACACAATTCTTCTGGT	C	ATGCCTTTTCTTCTTTACTT	0.999
atp8	76	26	CCC->UCC	Pro->Ser	TCTTCTTTACTTTCTATATT	C	CCATATGCAATGATGGAGAT	0.997
atp9	20	7	UCA->UUA	Ser->Leu	GATGTTAGAAGGTGCAAAAT	C	AATGGGTGCCGGAGCTGCTA	1
atp9	50	17	UCA->UUA	Ser->Leu	CGGAGCTGCTACAATTGCTT	C	AGCGGGAGCTGCTGTCGGTA	1
atp9	96	32	AUC->AUU	Ile->Ile	AACGTGTTCAGTTCTTTGAT	C	CATTCCGTGGCGCGAAATCC	0.983
atp9	134	45	UCA->UUA	Ser->Leu	TCCATCATTGGCTAAACAAT	C	ATTTGGTTATGCCATTTTGG	1
atp9	191	64	CCA->CUA	Pro->Leu	AGCTATTGCATTGTTTGCTC	C	AATGATGGCCTTTTTGATCT	1
atp9	212	71	UCA->UUA	Ser->Leu	AATGATGGCCTTTTTGATCT	C	ATCCGTATTCCGATCGAAGA	0.995
atp9	215	72	UCC->UUC	Ser->Phe	GATGGCCTTTTTGATCTCAT	C	CGTATTCCGATCGAAGAAAG	0.994
atp9	223	75	CGA->UGA	Arg->End	TTTTGATCTCATCCGTATTC	C	GATCGAAGAAAGAAGGTTTC	0.986
ccmB	28	10	CAU->UAU	His->Tyr	GACTCTTTCTTTCACTATAT	C	ATAAACGGATCTTCCCCTCC	0.947
ccmB	43	15	CCC->UCC	Pro->Ser	TATATCATAAACGGATCTTC	C	CCTCCACACCAATCACGAGT	0.998
ccmB	71	24	CCA->CUA	Pro->Leu	ACCAATCACGAGTTTTTCTC	C	ATTCCTCTCGTATATCGTCG	0.992
ccmB	80	27	UCG->UUG	Ser->Leu	GAGTTTTTCTCCATTCCTCT	C	GTATATCGTCGTAACGCCCT	0.969
ccmB	87	29	AUC->AUU	Ile->Ile	TCTCCATTCCTCTCGTATAT	C	GTCGTAACGCCCTTAATGCT	0.963
ccmB	128	43	UCA->UUA	Ser->Leu	AGGTTTTGAAAAAGACTTTT	C	ATGTCATTCCCATTTAGGTC	0.998
ccmB	137	46	UCC->UUC	Ser->Phe	AAAAGACTTTTCATGTCATT	C	CCATTTAGGTCCGATTCGGA	0.988
ccmB	148	50	CCG->UUG	Pro->Leu	CATGTCATTCCCATTTAGGT	C	CGATTCGGATCCCTCCGTTG	0.989
ccmB	149	50	CCG->UUG	Pro->Leu	ATGTCATTCCCATTTAGGTC	C	GATTCGGATCCCTCCGTTGT	0.996
ccmB	154	52	CGG->UGG	Arg->Trp	ATTCCCATTTAGGTCCGATT	C	GGATCCCTCCGTTGTTTCCT	0.978
ccmB	160	54	CCU->UCU	Pro->Ser	ATTTAGGTCCGATTCGGATC	C	CTCCGTTGTTTCCTTTTCCT	0.992
ccmB	164	55	CCG->CUG	Pro->Leu	AGGTCCGATTCGGATCCCTC	C	GTTGTTTCCTTTTCCTCCCG	0.989
ccmB	172	58	CCU->UCU	Pro->Ser	TTCGGATCCCTCCGTTGTTT	C	CTTTTCCTCCCGCACCTTTT	0.988
ccmB	179	60	CCU->CUU	Pro->Leu	CCCTCCGTTGTTTCCTTTTC	C	TCCCGCACCTTTTCCTCGAA	0.988
ccmB	181	61	CCC->UCC	Pro->Ser	CTCCGTTGTTTCCTTTTCCT	C	CCGCACCTTTTCCTCGAAAT	0.996
ccmB	193	65	CCU->UUU	Pro->Phe	CTTTTCCTCCCGCACCTTTT	C	CTCGAAATGAGAAAGAAGAT	0.954
ccmB	194	65	CCU->UUU	Pro->Phe	TTTTCCTCCCGCACCTTTTC	C	TCGAAATGAGAAAGAAGATG	0.997
ccmB	286	96	CGG->UGG	Arg->Trp	TTCTACAATTGGTAGGTCAC	C	GGGTTATTCAAATAAGTTGT	0.999
ccmB	338	113	CCG->CUG	Pro->Leu	TTTTCCCATGTTAAAACTTC	C	GTACCAATTCGGTCGATCCG	0.965
ccmB	367	123	CGG->UGG	Arg->Trp	TCGGTCGATCCGGAATGGAT	C	GGTTAAACATTCTATTAGGG	0.982
ccmB	379	127	CUA->UUA	Leu->Leu	GAATGGATCGGTTAAACATT	C	TATTAGGGAGCCTGGTCTTG	0.932
ccmB	424	142	CGU->UGU	Arg->Cys	TTCTGTGTGGTATTCATTCT	C	GTTCGGCTCTTGGAATCACA	0.994
ccmB	428	143	UCG->UUG	Ser->Leu	GTGTGGTATTCATTCTCGTT	C	GGCTCTTGGAATCACATCCA	0.996
ccmB	467	156	UCG->UUG	Ser->Leu	CAGCCGTGGTTGGAACAGCT	C	GCAAAATCCAACCACTTCAC	0.942
ccmB	475	159	CCA->UUA	Pro->Leu	GTTGGAACAGCTCGCAAAAT	C	CAACCACTTCACCTACTTCA	0.997
ccmB	476	159	CCA->UUA	Pro->Leu	TTGGAACAGCTCGCAAAATC	C	AACCACTTCACCTACTTCAT	0.996
ccmB	485	162	UCA->UUA	Ser->Leu	CTCGCAAAATCCAACCACTT	C	ACCTACTTCATTGCCCCCAA	0.985
ccmB	494	165	UCA->UUA	Ser->Leu	TCCAACCACTTCACCTACTT	C	ATTGCCCCCAACCGTTTCTC	0.992
ccmB	502	168	CCA->UUA	Pro->Leu	CTTCACCTACTTCATTGCCC	C	CAACCGTTTCTCGTACCTCT	0.926
ccmB	503	168	CCA->UUA	Pro->Leu	TTCACCTACTTCATTGCCCC	C	AACCGTTTCTCGTACCTCTA	0.992
ccmB	512	171	UCU->UUU	Ser->Phe	TTCATTGCCCCCAACCGTTT	C	TCGTACCTCTATTGAAACAG	0.991
ccmB	514	172	CGU->UGU	Arg->Cys	CATTGCCCCCAACCGTTTCT	C	GTACCTCTATTGAAACAGAA	0.981
ccmB	548	183	CCU->CUU	Pro->Leu	AACAGAATGGTTTCATGTTC	C	TTCATCGATTGGTTATTCCT	1
ccmB	551	184	UCA->UUA	Ser->Leu	AGAATGGTTTCATGTTCCTT	C	ATCGATTGGTTATTCCTCCC	0.993
ccmB	554	185	UCG->UUG	Ser->Leu	ATGGTTTCATGTTCCTTCAT	C	GATTGGTTATTCCTCCCCGT	0.975
ccmB	566	189	UCC->UUC	Ser->Phe	TCCTTCATCGATTGGTTATT	C	CTCCCCGTTCGTATCTCTTT	0.994
ccmB	569	190	UCC->UUC	Ser->Phe	TTCATCGATTGGTTATTCCT	C	CCCGTTCGTATCTCTTTTTC	0.909
ccmB	572	191	CCG->CUG	Pro->Leu	ATCGATTGGTTATTCCTCCC	C	GTTCGTATCTCTTTTTCCAA	0.996
ccmB	596	199	UCG->UUG	Ser->Leu	CGTATCTCTTTTTCCAATTT	C	GGTCTCGATTAGTTTACAAG	0.999
ccmC	5	2	UCU->UUU	Ser->Phe	AGGACCAAATTCTCACATGT	C	TCTTTCGTTATTACAACCTT	0.997
ccmC	76	26	CGG->UGG	Arg->Trp	CGCAAATTCTCATTGGATCT	C	GGTTGTTCTTAACAGCGATG	1
ccmC	103	35	CAU->UAU	His->Tyr	TCTTAACAGCGATGGCTATT	C	ATTTAAGTCTTCGGGTAGCA	0.999
ccmC	115	39	CGG->UGG	Arg->Trp	TGGCTATTCATTTAAGTCTT	C	GGGTAGCACCACTAGATCTT	0.991
ccmC	133	45	CUU->UUU	Leu->Phe	TTCGGGTAGCACCACTAGAT	C	TTCAACAAGGTGGAAATTCT	0.987
ccmC	179	60	GCG->GUG	Ala->Val	TCTGTATGTACATGTTCCTG	C	GGCTCGGATGAGTATTCTTG	1
ccmC	184	62	CGG->UGG	Arg->Trp	ATGTACATGTTCCTGCGGCT	C	GGATGAGTATTCTTGTTTAT	0.994
ccmC	281	94	ACA->AUA	Thr->Ile	TCGCTCTTCCGGAACCGGTA	C	AGAAATGGGTGCTTTTTTTA	0.986
ccmC	331	111	CGG->UGG	Arg->Trp	CTTTAGTGACTGGGGGGTTT	C	GGGGAAGACCTATGTGGGGC	0.996
ccmC	395	132	UCG->UUG	Ser->Leu	TTTAACCTCTGTATTCATCT	C	GTTCCTTATTTACCTGGGTG	0.996
ccmC	399	133	UUC->UUU	Phe->Phe	ACCTCTGTATTCATCTCGTT	C	CTTATTTACCTGGGTGCACT	0.994
ccmC	400	134	CUU->UUU	Leu->Phe	CCTCTGTATTCATCTCGTTC	C	TTATTTACCTGGGTGCACTG	0.999
ccmC	421	141	CGU->UGU	Arg->Cys	TTATTTACCTGGGTGCACTG	C	GTTTTCAAAAGCTTCCTGTC	0.999
ccmC	436	146	CCU->UCU	Pro->Ser	CACTGCGTTTTCAAAAGCTT	C	CTGTCGAACCGGCTTCTATT	0.999
ccmC	446	149	CCG->CUG	Pro->Leu	TCAAAAGCTTCCTGTCGAAC	C	GGCTTCTATTTCAATCCGTG	0.996
ccmC	458	153	UCA->UUA	Ser->Leu	TGTCGAACCGGCTTCTATTT	C	AATCCGTGTTGGACCGATCG	0.994
ccmC	463	155	CGU->UGU	Arg->Cys	AACCGGCTTCTATTTCAATC	C	GTGTTGGACCGATCGATATA	0.994
ccmC	473	158	CCG->CUG	Pro->Leu	TATTTCAATCCGTGTTGGAC	C	GATCGATATACCAATAATCA	0.999
ccmC	521	174	UCG->UUG	Ser->Leu	AGTCAACTGGTGGAATACAT	C	GCATCAACCTGGGAGCATTA	0.999
ccmC	548	183	UCU->UUU	Ser->Phe	ACCTGGGAGCATTAGCAGAT	C	TGGTACATCAATACATGTTC	0.995
ccmC	568	190	CCU->UCU	Pro->Ser	CTGGTACATCAATACATGTT	C	CTATGCCCATTCCAATCTTG	0.999
ccmC	575	192	CCC->CUC	Pro->Leu	ATCAATACATGTTCCTATGC	C	CATTCCAATCTTGTCTAACT	0.998
ccmC	608	203	CCC->CUC	Pro->Leu	GTCTAACTTTGCTAACTTCC	C	CTTCTCAACCCGTATCTTGT	1
ccmC	614	205	UCA->UUA	Ser->Leu	CTTTGCTAACTTCCCCTTCT	C	AACCCGTATCTTGTTCGTTT	0.992
ccmC	619	207	CGU->UGU	Arg->Cys	CTAACTTCCCCTTCTCAACC	C	GTATCTTGTTCGTTTTGGAA	0.997
ccmC	630	210	UUC->UUU	Phe->Phe	TTCTCAACCCGTATCTTGTT	C	GTTTTGGAAACACGTCTTCC	0.919
ccmC	650	217	CCU->CUU	Pro->Leu	CGTTTTGGAAACACGTCTTC	C	TATTCCATCTTTTCCCGAAT	0.958
ccmC	656	219	CCA->CUA	Pro->Leu	GGAAACACGTCTTCCTATTC	C	ATCTTTTCCCGAATCTCCTT	0.991
ccmC	665	222	CCC->CUC	Pro->Leu	TCTTCCTATTCCATCTTTTC	C	CGAATCTCCTTTAACGGAAG	0.999
ccmC	673	225	CCU->UCU	Pro->Ser	TTCCATCTTTTCCCGAATCT	C	CTTTAACGGAAGAAATAGAA	0.993
ccmFC	38	13	UCC->UUC	Ser->Phe	CTTTTTCTTTTTCATTACTT	C	CATGGTCGTGCCTCGTGGCA	0.998
ccmFC	50	17	CCU->CUU	Pro->Leu	CATTACTTCCATGGTCGTGC	C	TCGTGGCACGGCAGCACCCG	1
ccmFC	52	18	CGU->UGU	Arg->Cys	TTACTTCCATGGTCGTGCCT	C	GTGGCACGGCAGCACCCGTA	0.984
ccmFC	103	35	CCC->UCC	Pro->Ser	GGTTTGTCAGTAGAGATGTT	C	CCACAGGTGCCCCTTCTTCC	0.995
ccmFC	119	40	UCU->UUU	Ser->Phe	TGTTCCCACAGGTGCCCCTT	C	TTCCAATGGTACTATAATTC	0.987
ccmFC	122	41	UCC->UUC	Ser->Phe	TCCCACAGGTGCCCCTTCTT	C	CAATGGTACTATAATTCCTA	1
ccmFC	146	49	CCU->CUU	Pro->Leu	TGGTACTATAATTCCTATTC	C	TATCTCTTTATTCCCTCTTT	0.997
ccmFC	305	102	UCA->UUA	Ser->Leu	AACTCGAGCTAGAAACGCCT	C	ATTTCGTTTCGTTCCCGTTC	1
ccmFC	310	104	CGU->UGU	Arg->Cys	GAGCTAGAAACGCCTCATTT	C	GTTTCGTTCCCGTTCTTCAT	0.99
ccmFC	406	136	CGU->UGU	Arg->Cys	TGCTCTGTTTACTATTCTTT	C	GTACTCTCTTCTCTTTACCA	0.998
ccmFC	878	293	UCU->UUU	Ser->Phe	TCATTTACATGGACCCACTT	C	TCATTCCATTTGTGGTAATT	0.995
ccmFC	1139	380	CCA->CUA	Pro->Leu	AGTAGCTATACATACAAATC	C	ATTTACGGATCTATATGCTT	0.935
ccmFC	1160	387	UCG->UUG	Ser->Leu	ATTTACGGATCTATATGCTT	C	GATTGGAACTGGAAGTTCCA	0.999
ccmFC	1234	412	CGG->UGG	Arg->Trp	TGCCTTTTATTTTTTTTATT	C	GGATAGGATTTCTGTTGGCT	0.989
ccmFC	1268	423	UCG->UUG	Ser->Leu	GTTGGCTTCGTTGGGAGGCT	C	GCGTAGTTTGTTACGTCAGC	0.993
ccmFN	38	13	CCC->CUC	Pro->Leu	GTTTCATTATTCGTTATTTC	C	CGGTCTTTTCGTTGCATTCA	0.979
ccmFN	98	33	CCU->CUU	Pro->Leu	ACCAGCGTTTGGTGCAGCAC	C	TGCATTTTGGTGTATTCTTC	0.999
ccmFN	137	46	UCG->UUG	Ser->Leu	TCTTTCTTTCTTTGGTCTTT	C	GTTCCGTCATATTCCTAATA	0.994
ccmFN	142	48	CGU->UGU	Arg->Cys	CTTTCTTTGGTCTTTCGTTC	C	GTCATATTCCTAATAACTTA	0.996
ccmFN	151	51	CCU->UCU	Pro->Ser	GTCTTTCGTTCCGTCATATT	C	CTAATAACTTATCCAATTAC	0.99
ccmFN	248	83	UCA->UUA	Ser->Leu	TCATGAGGGTAGTATTTTAT	C	ATGGTGTCGGATCCCAAGTT	0.999
ccmFN	256	86	CGG->UGG	Arg->Trp	GTAGTATTTTATCATGGTGT	C	GGATCCCAAGTTTTTATGGA	0.999
ccmFN	263	88	CCA->CUA	Pro->Leu	TTTATCATGGTGTCGGATCC	C	AAGTTTTTATGGATTCCTTC	1
ccmFN	283	95	CUU->UUU	Leu->Phe	CAAGTTTTTATGGATTCCTT	C	TTTGTTACCGGGGTCGACCC	0.995
ccmFN	365	122	UCG->UUG	Ser->Leu	TCTTTTTTATTCCTTTCTTT	C	GAACTTCGTGAAGAACCCCA	0.94
ccmFN	372	124	UUC->UUU	Phe->Phe	TATTCCTTTCTTTCGAACTT	C	GTGAAGAACCCCATTCGAGA	0.905
ccmFN	707	236	CCU->CUU	Pro->Leu	CATTGCTTTGTTTTTCTCTC	C	TTTCCTATCAGCGAGTTCCG	0.999
ccmFN	716	239	UCA->UUA	Ser->Leu	GTTTTTCTCTCCTTTCCTAT	C	AGCGAGTTCCGATCCTTTTG	0.991
ccmFN	754	252	CGU->UGU	Arg->Cys	TTGTTCGAAATTTCTTCGTT	C	GTACCGAACCGCTTGCAGAA	0.998
ccmFN	776	259	UCA->UUA	Ser->Leu	TACCGAACCGCTTGCAGAAT	C	AAATCCTGTTCCACAAGATC	0.981
ccmFN	788	263	CCA->CUA	Pro->Leu	TGCAGAATCAAATCCTGTTC	C	ACAAGATCCTATATCAGCTA	0.999
ccmFN	803	268	UCA->UUA	Ser->Leu	TGTTCCACAAGATCCTATAT	C	AGCTATACATCCTCCTTGCA	0.991
ccmFN	952	318	CGC->UGC	Arg->Cys	AAAAGAATGGAACGCTGCTT	C	GCTCTGCTGGATGCGTCGGA	0.993
ccmFN	1187	396	UCG->UUG	Ser->Leu	AAAGAAAGAGACCACTACTT	C	GCTTCTTTGTTGGACCGCCG	0.916
ccmFN	1270	424	CGG->UGG	Arg->Trp	GAATTTGGATCTTGATATGT	C	GGTGCTTTTTAACCGTAGGC	0.999
ccmFN	1298	433	CCA->CUA	Pro->Leu	TTTAACCGTAGGCATCTTGC	C	AGGAAGTTGGTGGGCTCATC	1
ccmFN	1315	439	CAU->UAU	His->Tyr	TGCCAGGAAGTTGGTGGGCT	C	ATCATGAATTAGGTCGGGGT	1
ccmFN	1330	444	CGG->UGG	Arg->Trp	GGGCTCATCATGAATTAGGT	C	GGGGTGGCTGGTGGTTTCGG	0.999
ccmFN	1348	450	CGG->UGG	Arg->Trp	GTCGGGGTGGCTGGTGGTTT	C	GGGATCCCGTAGAAAATGCT	0.999
ccmFN	1381	461	CGG->UGG	Arg->Trp	AAAATGCTTCTTTTATGCCT	C	GGGTATTAGCCACAGCTCGT	1
ccmFN	1399	467	CGU->UGU	Arg->Cys	CTCGGGTATTAGCCACAGCT	C	GTATTCATTCAGTCATTTTA	0.999
ccmFN	1442	481	UCG->UUG	Ser->Leu	CCTTCTTCATTCTTGGACCT	C	GTTTCTTAATATTGTGACTT	0.999
ccmFN	1466	489	CCA->CUA	Pro->Leu	TCTTAATATTGTGACTTTTC	C	ATGCTGTGTCTCAGGAACCT	0.999
ccmFN	1478	493	UCA->UUA	Ser->Leu	GACTTTTCCATGCTGTGTCT	C	AGGAACCTTTTCAATACGGT	1
ccmFN	1513	505	CCC->UCC	Pro->Ser	TACGGTCCGGATTGCTAGCT	C	CCGTTCATAGTTTTGCTACA	0.999
cob	118	40	CCG->UCG	Pro->Ser	GTTATTGGTGGGGGTTCGGT	C	CGTTAGCAGGTCTTTGTTTA	0.999
cob	286	96	CUC->UUC	Leu->Phe	CTAATGGGGCAAGTATGTTT	C	TCATTGTGGTTCACCTTCAT	0.999
cob	298	100	CAC->UAC	His->Tyr	GTATGTTTCTCATTGTGGTT	C	ACCTTCATATTTTTCGTGGT	0.999
cob	325	109	CAU->UAU	His->Tyr	ATATTTTTCGTGGTCTATAT	C	ATGCGAGTTATAGCAGTCCT	1
cob	358	120	CGG->UGG	Arg->Trp	GCAGTCCTAGGGAATTTGTT	C	GGTGTCTCGGAGTTGTAATC	1
cob	407	136	ACA->AUA	Thr->Ile	AATGATTGTGACAGCTTTTA	C	AGGATACGTACTACCTTGGG	0.999
cob	568	190	CAU->UAU	His->Tyr	ATCGTTTTTTTAGTCTTCAT	C	ATTTACTCCCTTTTCTTTTA	0.99
cob	808	270	CCC->UCC	Pro->Ser	ATATACCTGCTAATCCGATG	C	CCACCCCGCCTCATATTGTG	1
cob	853	285	CAU->UAU	His->Tyr	AATGGTATTTCCTACCGATC	C	ATGCCATTCTTCGTAGTATA	0.999
cob	908	303	CCA->CUA	Pro->Leu	AGGTGTAGCCGCAATAGCAC	C	AGTTTTTATATGTCTGTTGG	0.998
cob	982	328	CAC->UAC	His->Tyr	GTTCAAGTTTTCGCCCTATT	C	ACCAAGGACTATTTTGGTTG	0.992
cob	1084	362	CCU->UCU	Pro->Ser	TTACTATTGGACAAATTTCT	C	CTTTAGTTTTCTTCTTGTTC	0.998
cob	1124	375	CCG->CUG	Pro->Leu	CTTTGCCATAACGCCCATTC	C	GGGACGAGTTGGAAGAGGAA	0.993
cox1	2	1	ACG->AUG	Thr->Met	ACGAAATAATCTCAATTTGA	C	GACAAATCCGGTCCGATGGC	0.994
cox1	11	4	CCG->CUG	Pro->Leu	TCTCAATTTGACGACAAATC	C	GGTCCGATGGCTGTTCTCCA	0.991
cox1	15	5	GUC->GUU	Val->Val	AATTTGACGACAAATCCGGT	C	CGATGGCTGTTCTCCACTAA	0.982
cox1	242	81	UCU->UUU	Ser->Phe	GCCGGCGATGATAGGTGGAT	C	TGGTAATTGGTCTGTTCCGA	0.998
cox1	254	85	UCU->UUU	Ser->Phe	AGGTGGATCTGGTAATTGGT	C	TGTTCCGATTCTGATAGGTG	1
cox1	443	148	UCA->UUA	Ser->Leu	TTCTGGAGGAGCAGTTGATT	C	AGCAATTTCTAGTCTTCATC	0.996
cox1	452	151	UCU->UUU	Ser->Phe	AGCAGTTGATTCAGCAATTT	C	TAGTCTTCATCTATCTGGTA	1
cox1	515	172	UCC->UUC	Ser->Phe	CAATTTCATAACGACCATTT	C	CAACATGCGTGGACCTGGAA	0.939
cox1	551	184	UCA->UUA	Ser->Leu	TGGAATGACTATGCATAGAT	C	ACCCCTCTTTGTGTGGTCCG	1
cox1	590	197	CCA->CUA	Pro->Leu	CGTTCTAGTGACAGCATTCC	C	ACTTTTATTATCACTTCCGG	0.999
cox1	668	223	UCU->UUU	Ser->Phe	AAACTTTAATACAACCTTTT	C	TGATCCCGCTGGAGGGGGAG	0.999
cox1	715	239	CGG->UGG	Arg->Trp	TATTATACCAGCATCTCTTT	C	GGTTCTTCGGTCATCCAGAG	0.997
cox1	746	249	CCC->CUC	Pro->Leu	TCATCCAGAGGTGTATATTC	C	CATTCTGCCTGGATCCGGTA	0.998
cox1	761	254	UCC->UUC	Ser->Phe	TATTCCCATTCTGCCTGGAT	C	CGGTATCATAAGTCATATCG	0.996
cox1	1037	346	UCC->UUC	Ser->Phe	CATGTTATTTGCTGTAGGGT	C	CATCTTTTTGTTCACCATAG	0.999
cox1	1079	360	CCG->CUG	Pro->Leu	AGGACTCACTGGAATAGTCC	C	GGCAAATTCAGGGCTAGACA	0.996
cox1	1186	396	CAC->UAC	His->Tyr	TTGCTTTATTTGCAGGATTT	C	ACTATTGGGTGGGTAAAATC	1
cox1	1274	425	CCG->CUG	Pro->Leu	CACTTTTTTCGGGGTTAATC	C	GACCCTCTTTCCCATGCATT	0.994
cox1	1279	427	CUC->UUC	Leu->Phe	TTTTCGGGGTTAATCCGACC	C	TCTTTCCCATGCATTTCTTA	0.987
cox1	1402	468	CGU->UGU	Arg->Cys	ATATATCCGTAGTTGGGATT	C	GTCGTTTCTTCGTGGTCGTA	0.997
cox1	1405	469	CGU->UGU	Arg->Cys	TATCCGTAGTTGGGATTCGT	C	GTTTCTTCGTGGTCGTAACA	1
cox1	1433	478	UCA->UUA	Ser->Leu	CGTGGTCGTAACAATCACTT	C	AAGCAGTGGAAATAACAAAA	0.999
cox2	71	24	UCU->UUU	Ser->Phe	GGAACCATGGCAATTAGGAT	C	TCAAGACGCAGCAACACCTA	1
cox2	138	46	CUC->CUU	Leu->Leu	CACGATATCTTTTTCTTCCT	C	ATTCTGATTTTTGTTTTCGT	0.938
cox2	161	54	UCA->UUA	Ser->Leu	TCTGATTTTTGTTTTCGTAT	C	ACGGATCTTGGTTCGCGCTT	0.958
cox2	163	55	CGG->UGG	Arg->Trp	TGATTTTTGTTTTCGTATCA	C	GGATCTTGGTTCGCGCTTTA	0.999
cox2	278	93	CCG->CUG	Pro->Leu	CATTTTTCCTAGTATCATTC	C	GATGTTCATTGCTATACCAT	0.996
cox2	379	127	CGG->UGG	Arg->Trp	CTATTGGACATCAATGGTAT	C	GGACTTATGAGTATTCTGAC	0.998
cox2	443	148	ACG->AUG	Thr->Met	ACTCACTTTTGACAGTTATA	C	GATTCCAGAAGATGATCTAG	0.999
cox2	476	159	UCA->UUA	Ser->Leu	TGATCTAGAATTGGGTCAAT	C	ACGTTTATTAGAAGTGGACA	1
cox2	544	182	CCU->UCU	Pro->Ser	ATCTACGTATTATTGTAACA	C	CTGCTGATGTACCTCATAGT	0.999
cox2	557	186	CCU->CUU	Pro->Leu	TGTAACACCTGCTGATGTAC	C	TCATAGTTGGGCTGTACCTT	0.996
cox2	581	194	UCA->UUA	Ser->Leu	TAGTTGGGCTGTACCTTCCT	C	AGGTGTCAAATGTGATGCTG	1
cox2	698	233	ACG->AUG	Thr->Met	TGGAACTAATCATGCCTTTA	C	GCCTATCGTCGTAGAAGCTG	1
cox2	721	241	CCU->UCU	Pro->Ser	CTATCGTCGTAGAAGCTGTT	C	CTAGGAAAGATTATGGTTCT	0.999
cox2	742	248	CGG->UGG	Arg->Trp	CTAGGAAAGATTATGGTTCT	C	GGGTATCCAATCAATTAATC	0.999
cox3	245	82	CCU->CUU	Pro->Leu	CAAAGTCGTACAATTAGGAC	C	TCGATATGGTTTTATTCTGT	1
cox3	289	97	CUU->UUU	Leu->Phe	TCGTATCGGAGGTTATGTTC	C	TTTTTGCTTTTTTTCGGGCT	1
cox3	304	102	CGG->UGG	Arg->Trp	TGTTCCTTTTTGCTTTTTTT	C	GGGCTTCTTCTCATTCTTCT	0.996
cox3	311	104	UCU->UUU	Ser->Phe	TTTTGCTTTTTTTCGGGCTT	C	TTCTCATTCTTCTTTGGCAC	0.997
cox3	314	105	UCU->UUU	Ser->Phe	TGCTTTTTTTCGGGCTTCTT	C	TCATTCTTCTTTGGCACCTA	0.993
cox3	388	130	CGG->UGG	Arg->Trp	GGATTGGGGTTTTAGATCCT	C	GGGAAATCCCTTTTCTTAAT	0.999
cox3	413	138	CCU->CUU	Pro->Leu	AATCCCTTTTCTTAATACCC	C	TATTCTCCTTTCATCCGGAG	0.995
cox3	512	171	UCA->UUA	Ser->Leu	CGCTTTAGTAGCTACCGTTT	C	ACTGGCTCTAGTATTCACAG	1
cox3	754	252	CGG->UGG	Arg->Trp	GGCATTTTGTAGACGTGGTT	C	GGTTATTCCTATTTGTCTCT	1
matR	329	110	CCA->CUA	Pro->Leu	TGTACTACTATCGGCCCTAC	C	AGGCAACATCTACCTACACA	0.995
matR	416	139	UCG->UUG	Ser->Leu	GATTGTTCAGAGAATCAGAT	C	GGTTCTATTAAGGACAGGTC	0.973
matR	1067	356	CCU->CUU	Pro->Leu	ACGGAGTACGGTAGAATTCC	C	TGGTACGGTCATTCGGGAAG	1
matR	1682	561	UCC->UUC	Ser->Phe	CGGAGACATCGTAAATTGGT	C	CGCGGGCATCGCAATAAGTC	0.987
matR	1737	579	UAC->UAU	Tyr->Tyr	AGGTGCTGCGACAACCTTTA	C	CAAGTCCGAACGATTGTCGA	0.998
matR	1759	587	CAC->UAC	His->Tyr	AAGTCCGAACGATTGTCGAC	C	ACCAGATCCGCTGGTCTGCA	0.995
matR	1829	610	CCA->CUA	Pro->Leu	CTCGGCGCGGAATATAATCC	C	AAAGTACTCCAAAGACCCAA	0.991
matR	1847	616	CCA->CUA	Pro->Leu	CCCAAAGTACTCCAAAGACC	C	AAATATAGTAAATAAAGAAG	0.992
mttB	56	19	UCC->UUC	Ser->Phe	TTTGAATTACTCAACTATAT	C	CTATGAATTTCATTTCGCAC	0.948
mttB	76	26	CCG->UUG	Pro->Leu	CCTATGAATTTCATTTCGCA	C	CGGAAACTATTCTAGGAGAA	0.987
mttB	77	26	CCG->UUG	Pro->Leu	CTATGAATTTCATTTCGCAC	C	GGAAACTATTCTAGGAGAAG	0.985
mttB	115	39	CGG->UGG	Arg->Trp	AAGTTCGAATCCGTTTCGTT	C	GGATATTGATCGGTCTTGGT	0.995
mttB	151	51	CGU->UGU	Arg->Cys	TTGGTTTGACATGGTTTACG	C	GTTACTGGTTCCCGGAAGAG	0.999
mttB	163	55	CCG->UCG	Pro->Ser	GGTTTACGCGTTACTGGTTC	C	CGGAAGAGTTAATATCTCCA	0.998
mttB	179	60	UCU->UUU	Ser->Phe	GTTCCCGGAAGAGTTAATAT	C	TCCATTAGCTAAACCCTTTC	0.996
mttB	182	61	CCA->CUA	Pro->Leu	CCCGGAAGAGTTAATATCTC	C	ATTAGCTAAACCCTTTCTTA	0.985
mttB	239	80	UCA->UUA	Ser->Leu	GTATTTTGTTTGTACACAAT	C	AACGGAGGCCTTCCCGACAT	1
mttB	253	85	CCG->UCG	Pro->Ser	CACAATCAACGGAGGCCTTC	C	CGACATATGTTGCAATGTCT	0.972
mttB	313	105	CAU->UAU	His->Tyr	TCGTCTTTCCCTTAATAAGT	C	ATCAAATTTGGTGCTTTTTG	0.991
mttB	379	127	CUC->UUC	Leu->Phe	GGACGAAATACAATCGATTC	C	TCTATTTAAGTGGTTCTCGC	0.999
mttB	397	133	CGC->UGC	Arg->Cys	TCCTCTATTTAAGTGGTTCT	C	GCTTCTCCTTATTCCTGTTC	0.995
mttB	424	142	CUU->UUU	Leu->Phe	CCTTATTCCTGTTCCTAACT	C	TTCCCCGGGTAGTTCCCAAT	0.915
mttB	427	143	CCC->UCC	Pro->Ser	TATTCCTGTTCCTAACTCTT	C	CCCGGGTAGTTCCCAATGTT	0.922
mttB	430	144	CGG->UGG	Arg->Trp	TCCTGTTCCTAACTCTTCCC	C	GGGTAGTTCCCAATGTTTGG	0.984
mttB	458	153	CCA->CUA	Pro->Leu	TCCCAATGTTTGGCACTTTC	C	ATACTTCGTGGGTGCAACAT	0.999
mttB	523	175	CAU->UAU	His->Tyr	TACAACCTAAGATCTATGAC	C	ATATTATGTTAACTGTTCGT	0.997
mttB	548	183	UCG->UUG	Ser->Leu	TATGTTAACTGTTCGTATTT	C	GTTCATTCTATCGGTATGCT	0.997
mttB	556	186	CUA->UUA	Leu->Leu	CTGTTCGTATTTCGTTCATT	C	TATCGGTATGCTCCCAGGTA	0.941
mttB	592	198	CGU->UGU	Arg->Cys	AGGTACCTGTAATTGTGATC	C	GTTTGCCAGAACTCAGGGGT	0.999
mttB	599	200	CCA->CUA	Pro->Leu	TGTAATTGTGATCCGTTTGC	C	AGAACTCAGGGGTCTTTCTG	1
mttB	661	221	CCG->UCG	Pro->Ser	GTCGTTTTTTGATGGTTTTT	C	CGCTTTTCACAGCAGCTCTT	0.994
mttB	711	237	AUC->AUU	Ile->Ile	CCGGATATCTGGTGCCAAAT	C	GTCGCCCGTTTCCTTATTTC	0.997
mttB	718	240	CGU->UGU	Arg->Cys	TCTGGTGCCAAATCGTCGCC	C	GTTTCCTTATTTCTTTGATA	0.997
mttB	723	241	UUC->UUU	Phe->Phe	TGCCAAATCGTCGCCCGTTT	C	CTTATTTCTTTGATAATCGA	0.909
mttB	764	255	UCG->UUG	Ser->Leu	GTTGGCTATCTTTGTGGCAT	C	GATTGTACAAGTTCGTGAAG	0.999
nad1	2	1	ACG->AUG	Thr->Met	AGTGAATAGAAAATCGAAAA	C	GTACATAGCAGTTCCAGCTG	0.985
nad1	215	72	UCC->UUC	Ser->Phe	ACCAAGTAGTGCAAATTTCT	C	CCTTTTTAGAATGGCTCCAG	0.982
nad1	265	89	CGG->UGG	Arg->Trp	TTATGTTAAGTCTGGTCGCT	C	GGGCCGTTGTACCTTTTGAT	0.999
nad1	307	103	CCG->UUG	Pro->Leu	ATGGTATGGTATTGTCAGAT	C	CGAACATAGGGCTACTTTAT	0.995
nad1	308	103	CCG->UUG	Pro->Leu	TGGTATGGTATTGTCAGATC	C	GAACATAGGGCTACTTTATT	1
nad1	436	146	CCU->UCU	Pro->Ser	GATCTGCAGCTCAAATGGTC	C	CTTATGAAGTCTCTATCGGT	0.998
nad1	490	164	CCC->UCU	Pro->Ser	CTGTACTAATATGTGTAGGT	C	CCCGTAATTCGAGTGAGATT	0.997
nad1	492	164	CCC->UCU	Pro->Ser	GTACTAATATGTGTAGGTCC	C	CGTAATTCGAGTGAGATTGT	0.989
nad1	493	165	CGU->UGU	Arg->Cys	TACTAATATGTGTAGGTCCC	C	GTAATTCGAGTGAGATTGTC	0.995
nad1	500	167	UCG->UUG	Ser->Leu	ATGTGTAGGTCCCCGTAATT	C	GAGTGAGATTGTCATGGCGC	1
nad1	536	179	UCC->UUU	Ser->Phe	GGCGCAAAAGCAGATATGGT	C	CGGTATTCCCTTGTTCCCTG	0.997
nad1	537	179	UCC->UUU	Ser->Phe	GCGCAAAAGCAGATATGGTC	C	GGTATTCCCTTGTTCCCTGT	0.993
nad1	580	194	CGU->UGU	Arg->Cys	TGGTTATGTTCTTTATTTCT	C	GTCTAGCAGAAACTAATCGA	1
nad1	635	212	UCA->UUA	Ser->Leu	CCCAGAAGCGGAAGCTGAAT	C	AGTTGCAGGCTATAATGTAG	0.999
nad1	674	225	UCU->UUU	Ser->Phe	AGAATATTCTTCAATGGGGT	C	TGCTCTTTTTTTTTTGGGAG	1
nad1	725	242	CCA->CUA	Pro->Leu	TATGATCTTAATGAGTGGTC	C	ATGCACATCGCTCTCTCCAG	0.995
nad1	734	245	UCG->UUG	Ser->Leu	AATGAGTGGTCCATGCACAT	C	GCTCTCTCCAGGAGGTTGGC	0.997
nad1	740	247	UCU->UUU	Ser->Phe	TGGTCCATGCACATCGCTCT	C	TCCAGGAGGTTGGCCGCCTA	0.999
nad1	743	248	CCA->CUA	Pro->Leu	TCCATGCACATCGCTCTCTC	C	AGGAGGTTGGCCGCCTATCC	0.999
nad1	755	252	CCG->CUG	Pro->Leu	GCTCTCTCCAGGAGGTTGGC	C	GCCTATCCTAGATCTTCCCA	0.995
nad1	823	275	CUC->UUC	Leu->Phe	GGTTTAGTATCAAGGTGATT	C	TCTTTCTGTTTCTATATATA	0.987
nad1	898	300	CGG->UGG	Arg->Trp	ATCAATTAATGGGACTTGGC	C	GGAAAGTGTTCTTGCCTCTA	0.999
nad1	928	310	CGG->UGG	Arg->Trp	TCTTGCCTCTATCATTAGCT	C	GGGTAGTCGCCGTTTCTGGT	0.997
nad1	953	318	UCA->UUA	Ser->Leu	AGTCGCCGTTTCTGGTGTTT	C	AGTCACCTTTCAATGGCTCC	0.997
nad2	26	9	UCC->UUC	Ser->Phe	CAATCTTTTTTTAGCGGTTT	C	CCCAGAGATCTTTATCATTA	0.996
nad2	223	75	CUU->UUU	Leu->Phe	CCCATTTATTCTGGAATAAT	C	TTTTGAGGAGGGACAATTTT	0.973
nad2	308	103	UCU->UUU	Ser->Phe	CATTTCGATGTGTTTCGATT	C	TTTCGAACAAGAGAGGTTTG	0.995
nad2	356	119	CCA->CUA	Pro->Leu	TGAATTCATTGTATTAATTC	C	ACTTCCTACTCGCAGTATGC	0.995
nad2	361	121	CCU->UCU	Pro->Ser	TCATTGTATTAATTCCACTT	C	CTACTCGCAGTATGCTCTTT	0.999
nad2	367	123	CGC->UGC	Arg->Cys	TATTAATTCCACTTCCTACT	C	GCAGTATGCTCTTTATGATC	0.989
nad2	394	132	CAU->UAU	His->Tyr	TGCTCTTTATGATCTCGGCT	C	ATGATTCAATTTCCATGTAT	0.986
nad2	401	134	UCA->UUA	Ser->Leu	TATGATCTCGGCTCATGATT	C	AATTTCCATGTATTTAGCTA	0.947
nad2	428	143	CCU->CUU	Pro->Leu	CATGTATTTAGCTATTGAGC	C	TCAAAGTTTATGTTTTTATG	0.999
nad2	497	166	UCG->UUG	Ser->Leu	ATTTTCCACGGAAGCCGGCT	C	GAAATATTTGATCTTAGGTG	0.999
nad2	662	221	UCU->UUU	Ser->Phe	TATTTTTATGGGGATTCTAT	C	TATCGCTGTAGGATTCCTAT	0.999
nad2	809	270	UCU->UUU	Ser->Phe	TGCTAATATTTCACGTGTTT	C	TATTTATGGTTCCTATGGAG	0.998
nad2	920	307	CCU->CUU	Pro->Leu	CCAAACGAAAGTCAAAAGAC	C	TCTAGCTCATAGTTCAATTG	0.999
nad2	928	310	CAU->UAU	His->Tyr	AAGTCAAAAGACCTCTAGCT	C	ATAGTTCAATTGGACATGTA	0.995
nad2	958	320	CGU->UGU	Arg->Cys	TTGGACATGTAGGTTATATT	C	GTACTGGTTTCTCATGTGGA	1
nad2	962	321	ACU->AUU	Thr->Ile	ACATGTAGGTTATATTCGTA	C	TGGTTTCTCATGTGGAACCA	0.997
nad2	1127	376	UCG->UUG	Ser->Leu	AGCCAAAACGAATCCTATTT	C	GGCTATTACCTTCTCCATTA	0.999
nad2	1246	416	CCA->UCA	Pro->Ser	GTGGGGCTTACTTCCTAGCC	C	CAGTGGGAGTAGTGACTAGC	0.995
nad2	1276	426	CGU->UGU	Arg->Cys	TAGTGACTAGCGTTATAGGT	C	GTTTTTATTATATACGCTTA	1
nad2	1298	433	GCG->GUG	Ala->Val	TTTTTATTATATACGCTTAG	C	GAAAAGAATGTTTTTTGATA	1
nad2	1400	467	UCA->UUA	Ser->Leu	GACTTCCTCTTTCATTACTT	C	ATCCTTTCCATATCCCTCTC	0.99
nad2	1403	468	UCC->UUC	Ser->Phe	TTCCTCTTTCATTACTTCAT	C	CTTTCCATATCCCTCTCCCT	0.99
nad2	1408	470	CCA->UUA	Pro->Leu	CTTTCATTACTTCATCCTTT	C	CATATCCCTCTCCCTTGTTC	0.993
nad2	1409	470	CCA->UUA	Pro->Leu	TTTCATTACTTCATCCTTTC	C	ATATCCCTCTCCCTTGTTCT	0.99
nad2	1416	472	CCC->CCU	Pro->Pro	ACTTCATCCTTTCCATATCC	C	TCTCCCTTGTTCTCAGTTAC	0.955
nad2	1457	486	UCA->UUA	Ser->Leu	TCATCAAATGGCACTCAGTT	C	ATATCTTTAAGTTCGATCAT	1
nad3	61	21	CUA->UUA	Leu->Leu	GTCTGCTAGTTTCTTTGATC	C	TACTCGGTGTTCCTTTTCTA	0.963
nad4	29	10	UCU->UUU	Ser->Phe	ACATTTCTGTGAATGCTATT	C	TGATTTAAGTGGTCCTATTC	1
nad4	44	15	CCU->CUU	Pro->Leu	CTATTCTGATTTAAGTGGTC	C	TATTCTGTGTCCCGTGCTAG	0.997
nad4	74	25	ACU->AUU	Thr->Ile	TCCCGTGCTAGGAAGCATTA	C	TCCTCTTTTCATTCCAAATT	0.997
nad4	77	26	CCU->CUU	Pro->Leu	CGTGCTAGGAAGCATTACTC	C	TCTTTTCATTCCAAATTCAA	0.999
nad4	107	36	CCG->CUG	Pro->Leu	TCCAAATTCAAGAATACGAC	C	GATACGATTGATTGGTCTAT	0.997
nad4	154	52	CCC->UCC	Pro->Ser	CTCTTATTACTTTTTTGTAT	C	CCCCTGTTCCTCGGATACAA	0.999
nad4	158	53	CCU->CUU	Pro->Leu	TATTACTTTTTTGTATCCCC	C	TGTTCCTCGGATACAATTCG	0.997
nad4	164	55	CCU->CUU	Pro->Leu	TTTTTTGTATCCCCCTGTTC	C	TCGGATACAATTCGATCCTT	0.994
nad4	166	56	CGG->UGG	Arg->Trp	TTTTGTATCCCCCTGTTCCT	C	GGATACAATTCGATCCTTCT	1
nad4	197	66	UCU->UUU	Ser->Phe	CGATCCTTCTACGGCCAAAT	C	TCAATTTGTGGAAAGCCTTC	0.998
nad4	362	121	ACA->AUA	Thr->Ile	TTATGGGAAAGAGTATATTA	C	AGCATCTCTAATTCGTGAAT	0.999
nad4	368	123	UCU->UUU	Ser->Phe	GAAAGAGTATATTACAGCAT	C	TCTAATTCGTGAATTTCTAA	0.996
nad4	376	126	CGU->UGU	Arg->Cys	ATATTACAGCATCTCTAATT	C	GTGAATTTCTAATGATCGCC	0.995
nad4	403	135	CGC->UGC	Arg->Cys	TTCTAATGATCGCCGTGTTC	C	GCATGCTGGATCCTCTACTA	0.999
nad4	416	139	CCU->CUU	Pro->Leu	CGTGTTCCGCATGCTGGATC	C	TCTACTATTCTATGTTCTTC	0.992
nad4	433	145	CUU->UUU	Leu->Phe	ATCCTCTACTATTCTATGTT	C	TTCCCGAAAGCGTGCCAATC	0.999
nad4	436	146	CCC->UUC	Pro->Phe	CTCTACTATTCTATGTTCTT	C	CCGAAAGCGTGCCAATCCCT	0.999
nad4	437	146	CCC->UUC	Pro->Phe	TCTACTATTCTATGTTCTTC	C	CGAAAGCGTGCCAATCCCTA	0.992
nad4	449	150	CCA->CUA	Pro->Leu	TGTTCTTCCCGAAAGCGTGC	C	AATCCCTATGTTCATTATTA	0.995
nad4	608	203	UCA->UUA	Ser->Leu	AACCACCGATTTACAAATAT	C	ATTAACCACAGAATTTAGTG	0.999
nad4	659	220	UCU->UUU	Ser->Phe	AATCTTTCTATGGATTGCTT	C	TTTCGCCTCTTTCGCCGTCA	0.999
nad4	784	262	CAC->UAC	His->Tyr	TTCTTTTAAAATTGGGAACC	C	ACGGGTTTTTAAGATTTTCA	0.993
nad4	856	286	CUA->UUA	Leu->Leu	CCACTCCTTTCATTTATACT	C	TAAGCGCGATTGCTATAATA	0.982
nad4	896	299	UCA->UUA	Ser->Leu	ATATACTTCCTTGACCACTT	C	AAGACAGATCGATCTTAAGA	1
nad4	977	326	CCG->CUG	Pro->Leu	GACTATTGGTATGTTTAGTC	C	GAACATACAGGGAATTGGAG	1
nad4	1006	336	CUA->UUA	Leu->Leu	AGGGAATTGGAGGTAGCATT	C	TACCGATGTTAAGTCATGGA	0.952
nad4	1010	337	CCG->CUG	Pro->Leu	AATTGGAGGTAGCATTCTAC	C	GATGTTAAGTCATGGACTGG	1
nad4	1033	345	CCU->UCU	Pro->Ser	TGTTAAGTCATGGACTGGTT	C	CTTCAGCCCTTTTTCTATGT	0.999
nad4	1101	367	UAC->UAU	Tyr->Tyr	ACTCGACTTGTTAGATATTA	C	GGAGGTTCAGTGAGCACCAT	0.906
nad4	1109	370	UCA->UUA	Ser->Leu	TGTTAGATATTACGGAGGTT	C	AGTGAGCACCATGCCGAATC	0.999
nad4	1129	377	CUC->UUC	Leu->Phe	CAGTGAGCACCATGCCGAAT	C	TCTCTACCATTTCCTTCTCT	0.997
nad4	1142	381	UCC->UUC	Ser->Phe	GCCGAATCTCTCTACCATTT	C	CTTCTCTTTCACTTTGGCCA	0.997
nad4	1148	383	UCU->UUU	Ser->Phe	TCTCTCTACCATTTCCTTCT	C	TTTCACTTTGGCCAATATGA	0.999
nad4	1205	402	CCC->CUU	Pro->Leu	CAGCTTTATCGGGGAATTTC	C	CATCTCAGTAGGAGCTTTCC	1
nad4	1206	402	CCC->CUU	Pro->Leu	AGCTTTATCGGGGAATTTCC	C	ATCTCAGTAGGAGCTTTCCA	0.96
nad4	1211	404	UCA->UUA	Ser->Leu	TATCGGGGAATTTCCCATCT	C	AGTAGGAGCTTTCCAAAGAA	0.997
nad4	1355	452	CCA->CUA	Pro->Leu	CCTCCATAAATTCTCCGATC	C	AAATGGCAGAGAAGTTTCCA	0.995
nad4	1373	458	UCC->UUC	Ser->Phe	TCCAAATGGCAGAGAAGTTT	C	CATATTTATACCTTTTCTTG	0.999
nad4	1405	469	CGG->UGG	Arg->Trp	CTTTTCTTGTTGGAGTTGTT	C	GGATGGGTGTTCACCCCAAA	0.999
nad4	1417	473	CAC->UAC	His->Tyr	GAGTTGTTCGGATGGGTGTT	C	ACCCCAAAGTGTTCCCGGAC	0.999
nad4	1433	478	CCG->CUG	Pro->Leu	TGTTCACCCCAAAGTGTTCC	C	GGACCACATGCATACATCCG	0.997
nad4	1438	480	CAC->UAC	His->Tyr	ACCCCAAAGTGTTCCCGGAC	C	ACATGCATACATCCGTAAGT	0.979
nad4L	2	1	ACG->AUG	Thr->Met	GACATTCTACGTTCCCGAAA	C	GGATCCTATCAAATATTTCA	1
nad4L	41	14	UCU->UUU	Ser->Phe	CACATTTTCTATGATCATCT	C	TATTTTAGGTATTCGGGGAA	1
nad4L	55	19	CGG->UGG	Arg->Trp	TCATCTCTATTTTAGGTATT	C	GGGGAATCCTCCTTAATAGA	0.998
nad4L	86	29	CCU->CUU	Pro->Leu	CCTTAATAGACGAAATATTC	C	TATTATGTCAATGCCAATTG	0.982
nad4L	95	32	UCA->UUA	Ser->Leu	ACGAAATATTCCTATTATGT	C	AATGCCAATTGAATCAATGT	1
nad4L	100	34	CCA->UCA	Pro->Ser	ATATTCCTATTATGTCAATG	C	CAATTGAATCAATGTTATTA	1
nad4L	110	37	UCA->UUA	Ser->Leu	TATGTCAATGCCAATTGAAT	C	AATGTTATTAGCAGTGAATT	0.994
nad4L	131	44	UCG->UUG	Ser->Leu	AATGTTATTAGCAGTGAATT	C	GAACTTTTTGGTATTTTCCG	1
nad4L	158	53	UCG->UUG	Ser->Leu	TTTGGTATTTTCCGTTTCTT	C	GGATGATATGATGGGTCAAT	1
nad4L	179	60	UCA->UUA	Ser->Leu	GGATGATATGATGGGTCAAT	C	ATTTGCTTCATTGGTTCCAA	1
nad4L	188	63	UCA->UUA	Ser->Leu	GATGGGTCAATCATTTGCTT	C	ATTGGTTCCAACGGTGGCAG	0.999
nad4L	197	66	CCA->CUA	Pro->Leu	ATCATTTGCTTCATTGGTTC	C	AACGGTGGCAGCTGCGGAAT	0.999
nad5	242	81	CCG->CUG	Pro->Leu	GGGCTTCTTGTTCGATAGCC	C	GACCGTAGTGATGTTAATTG	1
nad5	272	91	UCC->UUC	Ser->Phe	GATGTTAATTGTGGTTACAT	C	CATAAGTAGCTTGGTCCATC	0.999
nad5	315	105	UCC->UCU	Ser->Ser	TATTCCATTTCATATATGTC	C	GAGGATCCGCATAGCCCTCG	0.989
nad5	374	125	CCA->CUA	Pro->Leu	CATTTTTACTTTTTTTATGC	C	AATGTTGGTGACTGGAGATA	0.995
nad5	398	133	UCU->UUU	Ser->Phe	GTTGGTGACTGGAGATAACT	C	TCTTCAATTATTCCTGGGAT	1
nad5	506	169	CCU->CUU	Pro->Leu	AGCAGCTATAAAAGCTATGC	C	TGTCAATCGAGTAGGTGATT	1
nad5	539	180	CCU->CUU	Pro->Leu	AGGTGATTTTGGATTAGCTC	C	TGGGATTTCGGGTCGTTTTA	1
nad5	548	183	UCG->UUG	Ser->Leu	TGGATTAGCTCCTGGGATTT	C	GGGTCGTTTTACTCTCTTTC	0.998
nad5	553	185	CGU->UGU	Arg->Cys	TAGCTCCTGGGATTTCGGGT	C	GTTTTACTCTCTTTCAAACA	0.999
nad5	598	200	CGU->UGU	Arg->Cys	ACTTTTCCACCATTTTTGCT	C	GTGCTAGTGCCCCCAGAAAT	1
nad5	608	203	GCC->GUC	Ala->Val	CATTTTTGCTCGTGCTAGTG	C	CCCCAGAAATTCTTGGATTT	0.993
nad5	629	210	UCU->UUU	Ser->Phe	CCCCAGAAATTCTTGGATTT	C	TTGCAATATGAGATTGAATG	0.999
nad5	676	226	CUU->UUU	Leu->Phe	CTCTGATTTGTATTTTACTT	C	TTATTGGTGCTGTTGGGAAA	0.999
nad5	713	238	UCG->UUG	Ser->Leu	GAAATCCGCACAGATAGGAT	C	GCATACTTGGTCACCCGATG	0.998
nad5	725	242	UCA->UUA	Ser->Leu	GATAGGATCGCATACTTGGT	C	ACCCGATGCTATGGAGGGTC	1
nad5	764	255	UCG->UUG	Ser->Leu	TCCCACTCCAGTATCCGCTT	C	GATTCATGCAGCAACTATGG	0.993
nad5	835	279	CCA->UCA	Pro->Ser	GCTCCCCTTTATTTGAATAC	C	CACCTACGGCTTTGATTGTT	1
nad5	863	288	UCU->UUU	Ser->Phe	GGCTTTGATTGTTATTACTT	C	TGCAGGAGCTACGACGTCAT	0.999
nad5	875	292	ACG->AUG	Thr->Met	TATTACTTCTGCAGGAGCTA	C	GACGTCATTCCTTGCGGCAA	1
nad5	1310	437	UCA->UUA	Ser->Leu	TTCTTATTACTCTTTTCGTT	C	ACTTTTTCTAACATTTCTAG	0.999
nad5	1400	467	UCA->UUA	Ser->Leu	CATTCCTATGGCCATTCCTT	C	AATACTTCTGGCTCTCGGGA	1
nad5	1490	497	CCC->CUC	Pro->Leu	CAATTTTTGGGCCAATTCCC	C	CTTCGTACTACCAAAAAATG	0.999
nad5	1550	517	ACC->AUC	Thr->Ile	GTTTGCTGCTCCAACCATTA	C	CAAACTAATACCTATTCTGT	0.998
nad5	1580	527	UCA->UUA	Ser->Leu	ACCTATTCTGTTTAGTACTT	C	AGGTGCTTCTGTTGCGTATA	0.997
nad5	1589	530	UCU->UUU	Ser->Phe	GTTTAGTACTTCAGGTGCTT	C	TGTTGCGTATAATGTAAATC	0.985
nad5	1610	537	CCC->CUC	Pro->Leu	TGTTGCGTATAATGTAAATC	C	CGTAGCGGATCAATTCCAAC	0.999
nad5	1916	639	UCU->UUU	Ser->Phe	AACTCTATTTGTGACCTTTT	C	TCGTATGTGGGACTCTCTAT	0.999
nad5	1918	640	CGU->UGU	Arg->Cys	CTCTATTTGTGACCTTTTCT	C	GTATGTGGGACTCTCTATCT	0.999
nad5	1958	653	UCG->UUG	Ser->Leu	TTCTTGGGTAGATAATCGAT	C	GTCTTTCATTTTGATAGTGA	0.972
nad5	1981	661	CGU->UGU	Arg->Cys	CTTTCATTTTGATAGTGAGT	C	GTTTTTATAATAATAAGTAA	0.953
nad6	26	9	CCA->CUA	Pro->Leu	ACTTTCTGTTTTGTCGAGCC	C	AGCTTTGGTCTCTGGTTTGA	0.999
nad6	88	30	CCC->UUC	Pro->Phe	CGGTACATTCCGTTTTGTTT	C	CCATCCCAGTCTTTCGCAAC	0.991
nad6	89	30	CCC->UUC	Pro->Phe	GGTACATTCCGTTTTGTTTC	C	CATCCCAGTCTTTCGCAACA	0.998
nad6	95	32	CCA->CUA	Pro->Leu	TTCCGTTTTGTTTCCCATCC	C	AGTCTTTCGCAACACTTCAG	0.994
nad6	103	35	CGC->UGC	Arg->Cys	TGTTTCCCATCCCAGTCTTT	C	GCAACACTTCAGGTTTACTT	0.997
nad6	161	54	CCA->CUA	Pro->Leu	CTTCTTCGCTATGATCTTCC	C	AGTAGTTCATATAGGAGCTA	1
nad6	169	57	CAU->UAU	His->Tyr	CTATGATCTTCCCAGTAGTT	C	ATATAGGAGCTATAGCCGTT	1
nad6	191	64	UCA->UUA	Ser->Leu	TATAGGAGCTATAGCCGTTT	C	ATTCCTATTCGTTGTTATGA	0.999
nad6	446	149	UCC->UUC	Ser->Phe	TTTACTTTATACCTACTATT	C	CGTCTGGTTTTTGGTTTCGA	1
nad7	38	13	UCG->UUG	Ser->Leu	GCAAATCAAAAATTTCACTT	C	GAATTCCGGACCTCAACATC	0.998
nad7	44	15	UCC->UUU	Ser->Phe	CAAAAATTTCACTTCGAATT	C	CGGACCTCAACATCCTGCTG	0.996
nad7	45	15	UCC->UUU	Ser->Phe	AAAAATTTCACTTCGAATTC	C	GGACCTCAACATCCTGCTGC	0.998
nad7	77	26	UCA->UUA	Ser->Leu	TCCTGCTGCTCATGGTGTTT	C	ACGATCAGTATTGGAAATGA	0.991
nad7	83	28	UCA->UUA	Ser->Leu	TGCTCATGGTGTTTCACGAT	C	AGTATTGGAAATGAACGGAG	1
nad7	200	67	UCU->UUU	Ser->Phe	TCTTCAAGCTTTACCTTATT	C	TGATCGTTCAGACTATGTTT	0.995
nad7	209	70	UCA->UUA	Ser->Leu	TTTACCTTATTCTGATCGTT	C	AGACTATGTTTCTACGATGG	0.989
nad7	224	75	ACG->AUG	Thr->Met	TCGTTCAGACTATGTTTCTA	C	GATGGCCCAAGAACACGCTC	1
nad7	244	82	CAU->UAU	His->Tyr	CGATGGCCCAAGAACACGCT	C	ATTCTTCAGCAGTAGAGAGA	0.998
nad7	251	84	UCA->UUA	Ser->Leu	CCAAGAACACGCTCATTCTT	C	AGCAGTAGAGAGACTTTTGA	0.981
nad7	316	106	CGU->UGU	Arg->Cys	AATATATACGAGTGTTATTC	C	GTGAAATAACTCGAATTTCA	0.997
nad7	335	112	UCA->UUA	Ser->Leu	CCGTGAAATAACTCGAATTT	C	AAATCATTCACTTGCTTTAA	0.999
nad7	344	115	UCA->UUA	Ser->Leu	AACTCGAATTTCAAATCATT	C	ACTTGCTTTAACTACTCATG	0.999
nad7	383	128	UCA->UUA	Ser->Leu	TGCTATGGATGTGGGAGCAT	C	AACTCCGTTCCTGTGGGCTT	1
nad7	578	193	UCA->UUA	Ser->Leu	CGACGAATTAGAAGAGATGT	C	AACCGGCAACCGTATCTGGA	1
nad7	679	227	CCA->UCA	Pro->Ser	GTGGTGTAATGTTAAGAGGT	C	CAGGGGTATGCTGGGATTTG	0.995
nad7	724	242	CAU->UAU	His->Tyr	GAGCAGCACCTTACGATGTT	C	ATGACCAATTGGATCCTGAC	1
nad7	739	247	CCU->UUU	Pro->Phe	ATGTTCATGACCAATTGGAT	C	CTGACGTACCAGTAGGTACC	0.999
nad7	740	247	CCU->UUU	Pro->Phe	TGTTCATGACCAATTGGATC	C	TGACGTACCAGTAGGTACCA	0.999
nad7	769	257	CGC->UGC	Arg->Cys	CAGTAGGTACCAGAGGAGAT	C	GCTATGATCGTTACTGTATC	1
nad7	789	263	AUC->AUU	Ile->Ile	CGCTATGATCGTTACTGTAT	C	CGTATCGAAGAGATGCGACA	0.922
nad7	836	279	CCU->CUU	Pro->Leu	TCGGATCATTGTGCAATGTC	C	TAATCAAATGCCTAGTGGCA	0.999
nad7	926	309	UCA->UUA	Ser->Leu	GAAACTATCCATGGAATCCT	C	AATTCACCATTTCGAACTTT	0.999
nad7	963	321	UCC->UCU	Ser->Ser	CTTTATACAGAAGGTTTTTC	C	GTACCAGCTTCTTCTACCTA	0.94
nad7	1050	350	CCC->CCU	Pro->Pro	AGTAATGGAAGCAATCGTCC	C	TACCGTCGTAAAATAAGAGC	0.966
nad7	1057	353	CGU->UGU	Arg->Cys	GAAGCAATCGTCCCTACCGT	C	GTAAAATAAGAGCACCTGGC	0.998
nad7	1079	360	UCU->UUU	Ser->Phe	TAAAATAAGAGCACCTGGCT	C	TGCCCATTCACAAGGACTCG	0.999
nad7	1088	363	UCA->UUA	Ser->Leu	AGCACCTGGCTCTGCCCATT	C	ACAAGGACTCGATTCTATGT	0.996
nad7	1103	368	UCU->UUU	Ser->Phe	CCATTCACAAGGACTCGATT	C	TATGTCCAAACATCACATGC	0.999
nad7	1124	375	CCA->CUA	Pro->Leu	TATGTCCAAACATCACATGC	C	AGCAGATGTGGTCACCATCA	1
nad7	1137	379	GUC->GUU	Val->Val	CACATGCCAGCAGATGTGGT	C	ACCATCATAGGTACTCAAGA	0.941
nad7	1166	389	UCU->UUU	Ser->Phe	AGGTACTCAAGATATTGTGT	C	TGGAGAGGTAGATAGATAGG	1
nad9	14	5	UCC->UUC	Ser->Phe	TATCTTTATGGATAACCAAT	C	CATTTTCAAATATAGTTGGG	0.998
nad9	92	31	UCG->UUG	Ser->Leu	ATCGGAACATGGGAATAGAT	C	GGATACCAATACGGACTACC	0.997
nad9	167	56	UCG->UUG	Ser->Leu	CTATACAAGGGTTCAAGTTT	C	GATCGATATTTGCGGAGTTG	0.998
nad9	298	100	CCG->UCG	Pro->Ser	ACGAAGTAACACGAATATCT	C	CGGTAGTCAGTCTATTTCCA	0.996
nad9	328	110	CGG->UGG	Arg->Trp	GTCTATTTCCATCAGCCGGC	C	GGTGGGAGCGAGAAGTTTGG	1
nad9	368	123	UCC->UUC	Ser->Phe	GGATATGTTTGGTGTTTCTT	C	CATCAATCATCCGGATCTAC	1
nad9	398	133	UCA->UUA	Ser->Leu	TCCGGATCTACGCCGTATAT	C	AACAGATTATGGTTTCGAGG	0.998
nad9	439	147	CUU->UUU	Leu->Phe	GTCATCCATTACGAAAAGAC	C	TTCCTCTGAGTGGATATGTG	0.998
rpl10	101	34	UCG->UUG	Ser->Leu	CTCATTCCATTCCAGTGGCT	C	GACCAGTAACCAATGGCGAA	0.995
rpl10	134	45	CCA->CUA	Pro->Leu	ATGGCGAAAACTCAAAAATC	C	ATGGTTTCCCGGTAGAACCC	0.994
rpl10	155	52	CCA->CUA	Pro->Leu	ATGGTTTCCCGGTAGAACCC	C	ATTTCGCCCAAGTTGTTGCG	0.975
rpl10	314	105	UCA->UUA	Ser->Leu	TATGGACCAAGATCTGCTTT	C	ATTATATGGGCAATACCGAT	0.99
rpl10	330	110	UAC->UAU	Tyr->Tyr	CTTTCATTATATGGGCAATA	C	CGATCGACTTTAGTCGATCA	0.963
rpl16	102	34	GGC->GGU	Gly->Gly	CTTGGTTTTGGAAGATATGG	C	ACTAAAAGTTGTAGAGCTGG	0.935
rpl16	104	35	ACU->AUU	Thr->Ile	TGGTTTTGGAAGATATGGCA	C	TAAAAGTTGTAGAGCTGGTC	1
rpl16	232	78	CUC->UUC	Leu->Phe	GTAAAATATGGGTAAGAGTT	C	TCGCAGATCTCCCTATTACC	0.995
rpl16	321	107	UCC->UCU	Ser->Ser	GGTTGGATTGCTCGTGTGTC	C	ACGGGACAAATCCCATTTGA	0.903
rpl16	335	112	CCA->CUA	Pro->Leu	TGTGTCCACGGGACAAATCC	C	ATTTGAAATGGATGGTGTGA	0.999
rpl16	401	134	CCA->CUA	Pro->Leu	TACATTAGCGGCGCATAAAC	C	ATGTTCGTCAACCAAGTTTG	0.997
rpl16	407	136	UCG->UUG	Ser->Leu	AGCGGCGCATAAACCATGTT	C	GTCAACCAAGTTTGTTCAGT	0.992
rpl2	215	72	CCA->CUA	Pro->Leu	TCGTTCTTCTCGGATCGCTC	C	AGTACGATGGATCGAGGGGG	0.996
rpl5	35	12	UCA->UUA	Ser->Leu	TTTTCATTACGAAGATGTAT	C	ACGTCAGGATCCGTTGCTCA	0.99
rpl5	47	16	CCG->CUG	Pro->Leu	AGATGTATCACGTCAGGATC	C	GTTGCTCAAACTGAATCACG	0.998
rpl5	64	22	CAC->UAC	His->Tyr	ATCCGTTGCTCAAACTGAAT	C	ACGCCAACGTTATGGAAGTT	0.946
rpl5	92	31	UCG->UUG	Ser->Leu	CGTTATGGAAGTTCCTGGAT	C	GTGTGAAATAAGAGTCGTAC	0.998
rpl5	166	56	CCG->UCG	Pro->Ser	GAAAATTGGCTATGGAGATT	C	CGCGCGGTCAGAAATTTATA	0.988
rpl5	169	57	CGC->UGC	Arg->Cys	AATTGGCTATGGAGATTCCG	C	GCGGTCAGAAATTTATACAG	1
rpl5	317	106	UCG->UUG	Ser->Leu	GCATGGAATGTCGAATTTTT	C	GGTCAGAATCTCGACAGTAA	0.998
rpl5	512	171	CCA->CUA	Pro->Leu	CACACAAGATGAGACTTTAC	C	ACCGTGGAGCGGCTTTTTGC	0.994
rpl5	515	172	CCG->CUG	Pro->Leu	ACAAGATGAGACTTTACCAC	C	GTGGAGCGGCTTTTTGCAAA	0.999
rps1	125	42	CCU->CUU	Pro->Leu	GTTCTTGGTGGATGCAGGAC	C	TGGGACCCCCAGAATTTGTA	0.985
rps1	158	53	CCU->CUU	Pro->Leu	AATTTGTATGCAAGATGAGC	C	TACAGGAGTGCCAATCAACC	0.996
rps1	209	70	UCC->UUC	Ser->Phe	GTTTGAGAATAAGGTGGGAT	C	CCTGGATCTAGTGGCCGGTG	0.978
rps10	62	21	ACG->AUG	Thr->Met	AGAAAGACCACCAAAAGTCA	C	GACCACCAAGATACGCATAG	0.996
rps10	298	100	CGG->UGG	Arg->Trp	AATTGCGCAAGAAGTTCTTT	C	GGTTAAAACGCCAGCGTATA	1
rps10	362	121	UCG->UUG	Ser->Leu	ATTTTCTTGCAAGACCCGTT	C	GGATAAGGGAAAACTCCAGA	0.998
rps10	391	131	CGA->UGA	Arg->End	GAAAACTCCAGAGATTGCTT	C	GAAGTAAGATCCTTGTGTTG	0.975
rps12	196	66	CAC->UAC	His->Tyr	ATCGACATGATATATTTGCT	C	ACATTCCGGGCGAAGGTCAT	0.998
rps13	5	2	UCA->UUA	Ser->Leu	AAAGGAAGGATCAAGAATGT	C	ATATATTTCAGGAGCTAGAT	0.991
rps13	26	9	UCA->UUA	Ser->Leu	ATATATTTCAGGAGCTAGAT	C	AGTTGCCGATAAACAAGTAA	1
rps13	56	19	UCA->UUA	Ser->Leu	TAAACAAGTAAGAATTGCCT	C	AACAAAAATTGATGGAATTG	0.987
rps13	100	34	CGU->UGU	Arg->Cys	CTAAAAAAGCCATTCAGGTT	C	GTTATCGATTAGGTATCAGT	0.993
rps13	243	81	UUC->UUU	Phe->Phe	CGAGCAGACATCGAACGATT	C	ATTTCGATTTCTTGTTATCG	0.976
rps19	138	46	UCC->UCU	Ser->Ser	CCGGAATTCGTTGATAGCTC	C	GTACGAATTTACAATGGAAA	0.982
rps19	164	55	UCU->UUU	Ser->Phe	AATTTACAATGGAAAAACTT	C	TGTTCGTTGTAAGATCACTG	0.994
rps19	221	74	UCG->UUG	Ser->Leu	TAAATTTGGAGAGTTTGCTT	C	GACACGGAAACGAAGACTTT	0.989
rps3	64	22	CGG->UGG	Arg->Trp	ATCGTAGTTCAGATTCAAGT	C	GGTTCAGTGATTATTATTAT	1
rps3	69	23	UUC->UUU	Phe->Phe	AGTTCAGATTCAAGTCGGTT	C	AGTGATTATTATTATGGTAA	0.984
rps3	92	31	UCA->UUA	Ser->Leu	TGATTATTATTATGGTAAAT	C	ACTGTATCAAGATGTCAATC	0.993
rps3	512	171	UCA->UUA	Ser->Leu	AAAGAAGAATCTTTCTAAAT	C	ACTTCGCGTCAGCGGGGCCT	0.945
rps3	713	238	UCG->UUG	Ser->Leu	GCGCCCCTCCTTGAATTATT	C	GGTCATGCAATACTTATTGA	0.997
rps3	890	297	UCG->UUG	Ser->Leu	CGCTTTTTTTGTAGAAAGCT	C	GACCAGCGAGAAAAAGTGTT	0.972
rps3	1031	344	CCA->CUA	Pro->Leu	CGGTGCTACCTTTTTCTTTC	C	AAGGGATGGGGTTGGGATGT	0.942
rps3	1364	455	CCG->CUG	Pro->Leu	TGTTTATCAAAGTGCTTCTC	C	GATTGCTCAAGACATCTCTT	1
rps3	1502	501	UCA->UUA	Ser->Leu	TATATGTTGTTCAGGTCGAT	C	AGAAGGCGCGGAAATAGCTA	0.999
rps3	1555	519	CGU->UGU	Arg->Cys	GAAAGTATGGAAAAACATCT	C	GTAATGTATTTAACCAGAAA	0.997
rps3	1588	530	CCU->UCU	Pro->Ser	ACCAGAAAATAGATTATGCT	C	CTGCGGAAGTATCTACTCGT	0.998
rps3	1619	540	UCA->UUA	Ser->Leu	ATCTACTCGTTATGGAATCT	C	AGGTGTCAAAGTGTGGATTT	1
rps4	70	24	CGG->UGG	Arg->Trp	GTCTACTTTTAGGAAATGTT	C	GGAACAGAGAACTTACAATA	1
rps4	154	52	CCG->UCG	Pro->Ser	CTATTAAGAGAAAGATTTAT	C	CGAGAGAAAATCTTAACAGT	0.998
rps4	185	62	UCA->UUA	Ser->Leu	TCTTAACAGTTACATCCAAT	C	ACAAACTACACGAAAGTTGC	0.996
rps4	205	69	CCC->UCC	Pro->Ser	CACAAACTACACGAAAGTTG	C	CCCTTTTTCATGGGGATTTA	1
rps4	214	72	CAU->UAU	His->Tyr	CACGAAAGTTGCCCCTTTTT	C	ATGGGGATTTACCCATCACA	0.998
rps4	278	93	CCA->CUA	Pro->Leu	AACTTCTTATATCCCTTTTC	C	ACTCAATCCAGAAACAAGAT	1
rps4	287	96	CCA->CUA	Pro->Leu	TATCCCTTTTCCACTCAATC	C	AGAAACAAGATCGGACGTTA	0.972
rps4	299	100	UCG->UUG	Ser->Leu	ACTCAATCCAGAAACAAGAT	C	GGACGTTATTCCGGTTCGTC	0.997
rps4	311	104	CCG->CUG	Pro->Leu	AACAAGATCGGACGTTATTC	C	GGTTCGTCTCCATTTTAGTG	0.996
rps4	356	119	CCG->CUG	Pro->Leu	TATTCCTCAAGCAAGGCAGC	C	GATAAGTCATCGAAGGGTTT	0.999
rps4	503	168	UCA->UUA	Ser->Leu	ATCTTTCTATATCGAAATAT	C	AGTTGAAAAAATCATAGGAA	0.985
rps4	906	302	AUC->AUU	Ile->Ile	TTTACTATGAAGAGCAAAAT	C	AAAAGGATCGAACTACCTAC	0.964
rps4	935	312	UCG->UUG	Ser->Leu	CGAACTACCTACTCATTATT	C	GGAGGTGAATCATAGAACAC	0.995
rps4	946	316	CAU->UAU	His->Tyr	CTCATTATTCGGAGGTGAAT	C	ATAGAACACTAAAAGCTGTG	0.985
rps4	971	324	UCU->UUU	Ser->Phe	AACACTAAAAGCTGTGGTAT	C	TTATGGACCTAACATAGGTC	0.997
rps4	1022	341	CCA->CUA	Pro->Leu	CGACATAAGATTGAAAGATC	C	AAACCTTCCTCTTCGGAGCG	0.991
rps4	1031	344	CCU->CUU	Pro->Leu	ATTGAAAGATCCAAACCTTC	C	TCTTCGGAGCGGAAACGGAC	0.996
rps4	1036	346	CGG->UGG	Arg->Trp	AAGATCCAAACCTTCCTCTT	C	GGAGCGGAAACGGACGTGGC	0.995
rps7	116	39	CCA->CUA	Pro->Leu	TTATCAAACTTTTCATCGCC	C	AGCTCAAACTGAACGCGATG	0.951
rps7	332	111	UCA->UUA	Ser->Leu	GATAAGCTTAGAGAAATGTT	C	ATTTGCTGAGATACTGGATG	0.996
sdh3	54	18	CUC->CUU	Leu->Leu	CCTATTTATAAGCCACAGCT	C	ACTTCGACGTTTCCAATTTC	0.98
sdh3	67	23	CCA->UCA	Pro->Ser	CACAGCTCACTTCGACGTTT	C	CAATTTCCCATAGAATCTCC	0.998
sdh3	74	25	UCC->UUC	Ser->Phe	CACTTCGACGTTTCCAATTT	C	CCATAGAATCTCCGGGGCTT	0.937
sdh4	29	10	UCG->UUG	Ser->Leu	GGCATTTTGTAGACGTGGTT	C	GGTTATTCCTATTTGTCTCT	1
sdh4	122	41	ACC->AUC	Thr->Ile	AAGCTCGAAGACAAAGAGAA	C	CGGGCTTTTCCAAAGAATTA	0.973
sdh4	203	68	CCA->CUA	Pro->Leu	AGTCTCTTCCACTTTCCTAC	C	AAATCTCTCTTTATTCTGGC	0.961
sdh4	259	87	CAU->UAU	His->Tyr	TCGAAGAGATTATGGCAGAT	C	ATGTTCACCAAGAAATGACC	0.998
sdh4	359	120	CCG->CUG	Pro->Leu	CTTGTCTCTCATTTCTTTTC	C	GAATAAATCGAAGAACCTAA	0.963
