# Supplementary material for: Assembly and evolutionary analysis of the complete mitochondrial genome of Trichosanthes kirilowii, a traditional Chinese medicinal plant
Source: PeerJ. 2024 Jul 18;12:e17747. doi: 10.7717/peerj.17747 (PMC11260417; doi:10.7717/peerj.17747)
Supplement: Supplemental Information 9 [file peerj-12-17747-s009.xlsx]

## Sheet: Sheet1
Table S9 The homologous DNA fragment in the T. kirilowii mitochondrial genome.
Number	Mitochondrial genome	% Identity	Alignment Length	Mismatches	Gap Openings	Alignment start (chloroplast genome)	Alignment end (chloroplast genome)	Alignment start (mitochondrial genome)	Alignment end (mitochondrial genome)	E-value	Bit Score	MTPT annotation
MTPT1	Chromosome1	99.98	4883	1	0	39434	44316	230812	225930	0	9012	partial rps14 ;complete psaB ;complete psaA
MTPT2	Chromosome1	99.297	7392	15	2	86208	93590	65425	58062	0	13328	partial rpl2 ;complete rpl23 ;complete trnI-CAU;partial ycf2
	Chromosome1	99.297	7392	15	2	149367	156749	58062	65425	0	13328	partial ycf2 ;complete trnI-CAU;complete rpl23 ;partial rpl2
MTPT3	Chromosome1	99.222	257	2	0	35911	36167	73053	73309	5.23e-130	464	partial psbD ;partial psbC
MTPT4	Chromosome2	98.438	576	7	1	21280	21855	47607	48180	0	1013	partial rpoC2
MTPT5	Chromosome2	98.077	52	1	0	102164	102215	81203	81152	4.46e-18	91.6	partial trnV-GAC
	Chromosome2	98.077	52	1	0	140742	140793	81152	81203	4.46e-18	91.6	partial trnV-GAC
MTPT6	Chromosome1	95.455	88	2	2	32	117	102932	102845	3.6e-32	139	complete trnH-GUG
MTPT7	Chromosome1	95.316	7045	188	47	142493	149451	121867	114879	0	11051	partial rps12 ;complete rps7 ;complete ndhB;complete trnL-CAA;partial ycf2
	Chromosome1	95.316	7045	188	47	93506	100464	114879	121867	0	11051	partial ycf2 ;complete trnL-CAA;complete ndhB;complete rps7 ;partial rps12
MTPT8	Chromosome1	94.872	39	2	0	11718	11756	82423	82461	8.02e-09	62.1	partial atpA
MTPT9	Chromosome1	94.118	85	4	1	110731	110814	144131	144047	7.8e-29	128	complete trnN-GUU
	Chromosome1	94.118	85	4	1	132143	132226	144047	144131	7.8e-29	128	complete trnN-GUU
MTPT10	Chromosome1	93.671	79	5	0	54794	54872	135126	135048	4.69e-26	119	IGS(trnV-UAC-atpE )
MTPT11	Chromosome2	88.795	1419	93	28	17804	19193	101648	103029	0	1679	partial rpoC2
MTPT12	Chromosome1	88.564	787	69	5	66158	66936	218898	219671	0	935	partial psbL ;complete psbF ;complete psbE
MTPT13	Chromosome1	81.609	87	4	6	88047	88121	27731	27645	8.02e-09	62.1	complete trnI-CAU
	Chromosome1	81.609	87	4	6	154836	154910	27645	27731	8.02e-09	62.1	partial trnI-CAU
MTPT14	Chromosome1	80.619	485	50	23	31747	32210	210557	210096	4.28e-91	335	complete trnD-GUC
MTPT15	Chromosome1	77.331	697	109	36	67702	68376	220300	220969	1.52e-100	366	complete petG ;complete trnW-CCA;complete trnP-UGG
